# Supplementary material for: Antifungal Prenylated Diphenyl Ethers from Arthrinium arundinis, an Endophytic Fungus Isolated from the Leaves of Tobacco (Nicotiana tabacum L.)
Source: PubMed Central journal article supplement (PMC6320909; doi:10.3390/molecules23123179), 2018-12-02
Supplement: molecules-23-03179-s001.pdf [file molecules-23-03179-s001.pdf]

---

## Supplementary Material

# **Antifungal Prenylated Diphenyl Ethers from *Arthrinium arundinis*, an Endophytic Fungus Isolated from the Leaves of Tobacco (*Nicotiana tabacum* L.)**

**Peng Zhang<sup>1</sup>, Xin Li<sup>2</sup>, Xiao-Long Yuan<sup>1</sup>, Yong-Mei Du<sup>1</sup>, Bin-Gui Wang<sup>2,\*</sup>, and Zhong-Feng Zhang<sup>1,\*</sup>**

<sup>1</sup> Tobacco Research Institute, Chinese Academy of Agricultural Sciences, Qingdao, Shandong 266101, China; zhangpeng@caas.cn (P. Z.); rayrock@126.com (X.-L. Y.); duyongmei@caas.cn (Y.-M. D.)

<sup>2</sup> Laboratory of Marine Biology and Biotechnology, Qingdao National Laboratory for Marine Science and Technology, Key Laboratory of Experimental Marine Biology, Institute of Oceanology, Chinese Academy of Sciences, Qingdao, Shandong 266071, China

\* Correspondences: wangbg@ms.qdio.ac.cn (B.-G. W.); zhangzhongfeng@caas.cn (Z.-F. Z.); Tel: +86-532-66715079 (Z.-F. Z.)

---

## Table of Contents

**Figure S1.** HRESIMS spectrum of compound **1**

**Figure S2.**  $^1\text{H}$  NMR (500 MHz, DMSO- $d_6$ ) spectrum of compound **1**

**Figure S3.**  $^{13}\text{C}$  NMR (125 MHz, DMSO- $d_6$ ) spectrum of compound **1**

**Figure S4.** COSY spectrum of compound **1**

**Figure S5.** HSQC spectrum of compound **1**

**Figure S6.** HMBC spectrum of compound **1**

**Figure S7.** HRESIMS spectrum of compound **2**

**Figure S8.**  $^1\text{H}$  NMR (500 MHz, DMSO- $d_6$ ) spectrum of compound **2**

**Figure S9.**  $^{13}\text{C}$  NMR (125 MHz, DMSO- $d_6$ ) and DEPT spectra of compound **2**

**Figure S10.** COSY spectrum of compound **2**

**Figure S11.** HSQC spectrum of compound **2**

**Figure S12.** HMBC spectrum of compound **2**

**Figure S13.** HRESIMS spectrum of compound **3**

**Figure S14.**  $^1\text{H}$  NMR (500 MHz, DMSO- $d_6$ ) spectrum of compound **3**

**Figure S15.**  $^{13}\text{C}$  NMR (125 MHz, DMSO- $d_6$ ) and DEPT spectra of compound **3**

**Figure S16.** COSY spectrum of compound **3**

**Figure S17.** HSQC spectrum of compound **3**

**Figure S18.** HMBC spectrum of compound **3**

**Figure S19.** ECD spectrum of compound **2**

**Figure S20.** Structure and population of the low-energy conformers ( $>2\%$ ) of **8R-1**

**Table S1.** Cartesian coordinates of the low-energy conformers ( $\geq 2\%$ ) of **1**

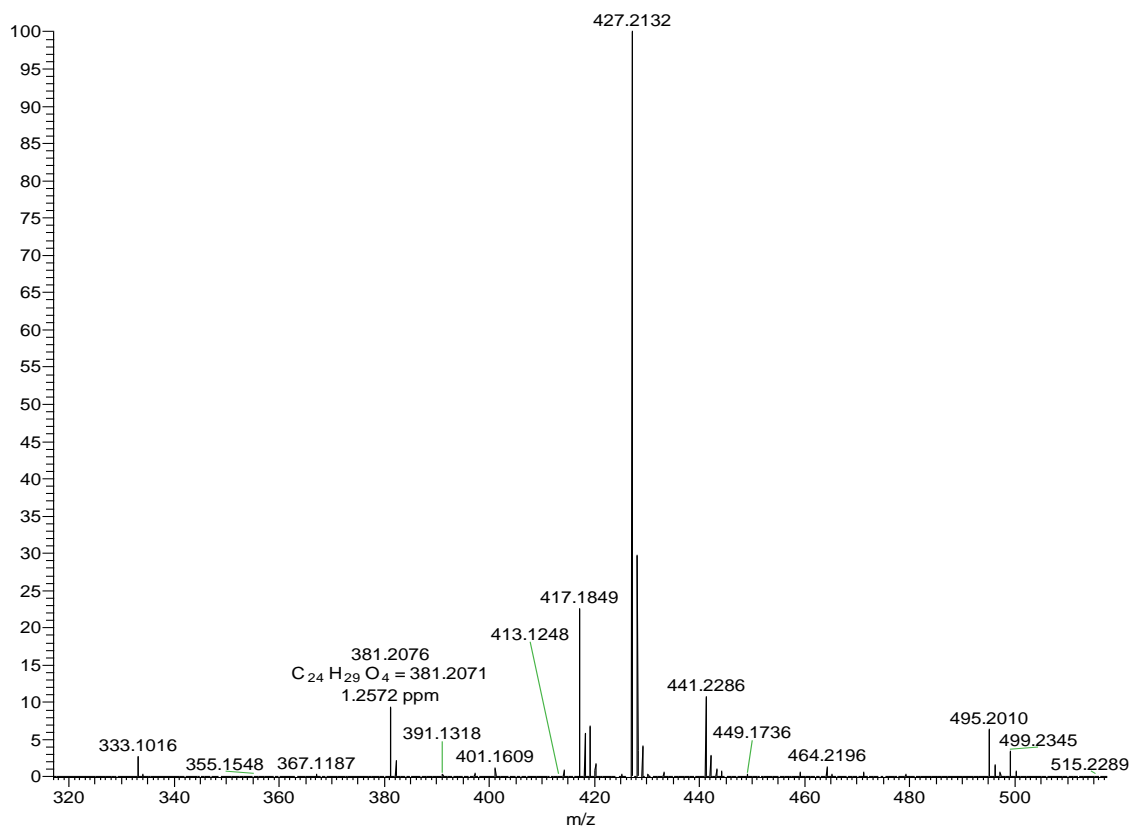

Figure S1. HRESIMS spectrum of compound 1

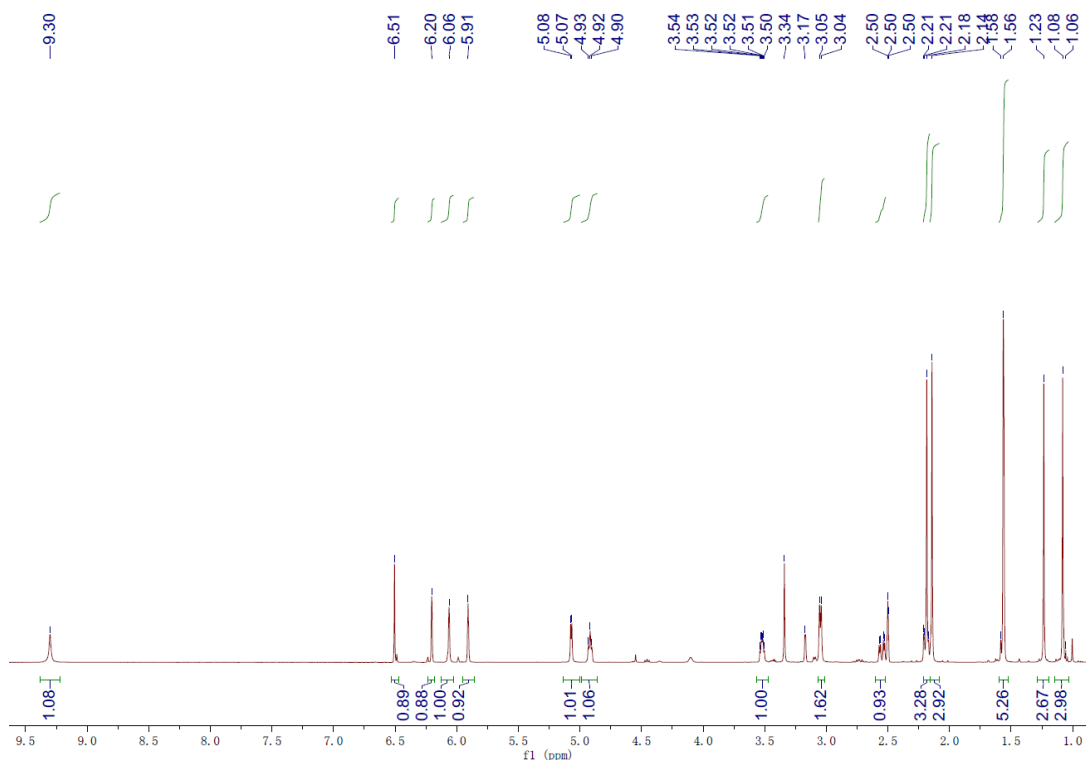

Figure S2. <sup>1</sup>H NMR (500 MHz, DMSO-*d*<sub>6</sub>) spectrum of compound 1

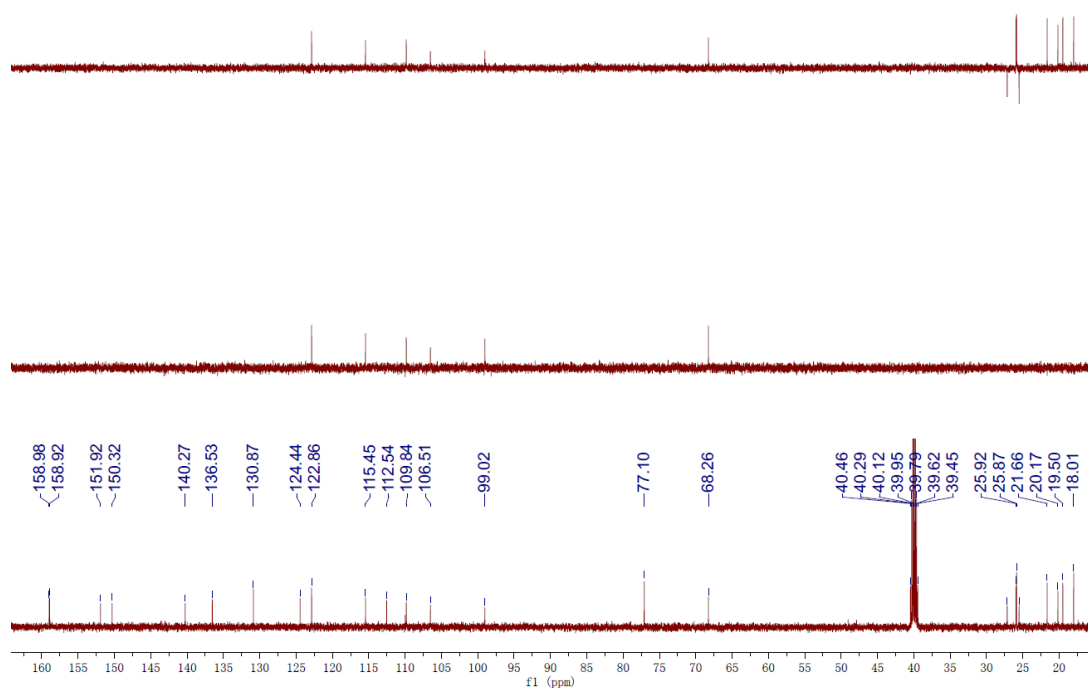

**Figure S3.**  $^{13}\text{C}$  NMR (125 MHz,  $\text{DMSO}-d_6$ ) spectrum of compound **1**

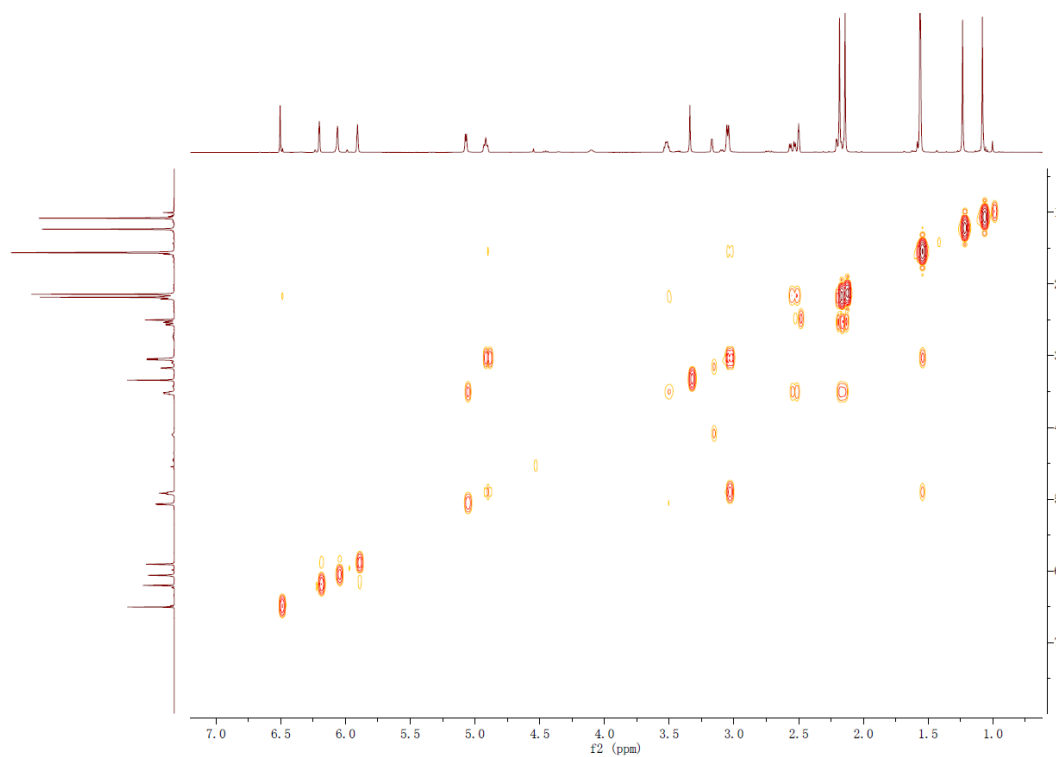

**Figure S4.** COSY spectrum of compound **1**

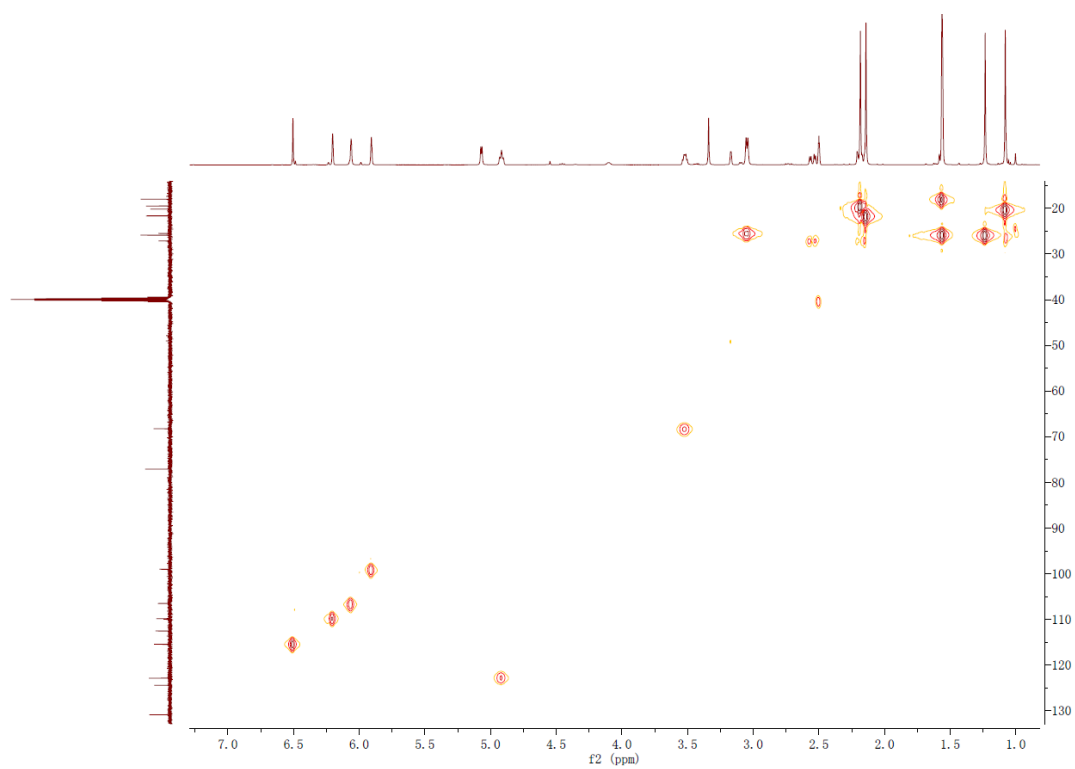

**Figure S5.** HSQC spectrum of compound **1**

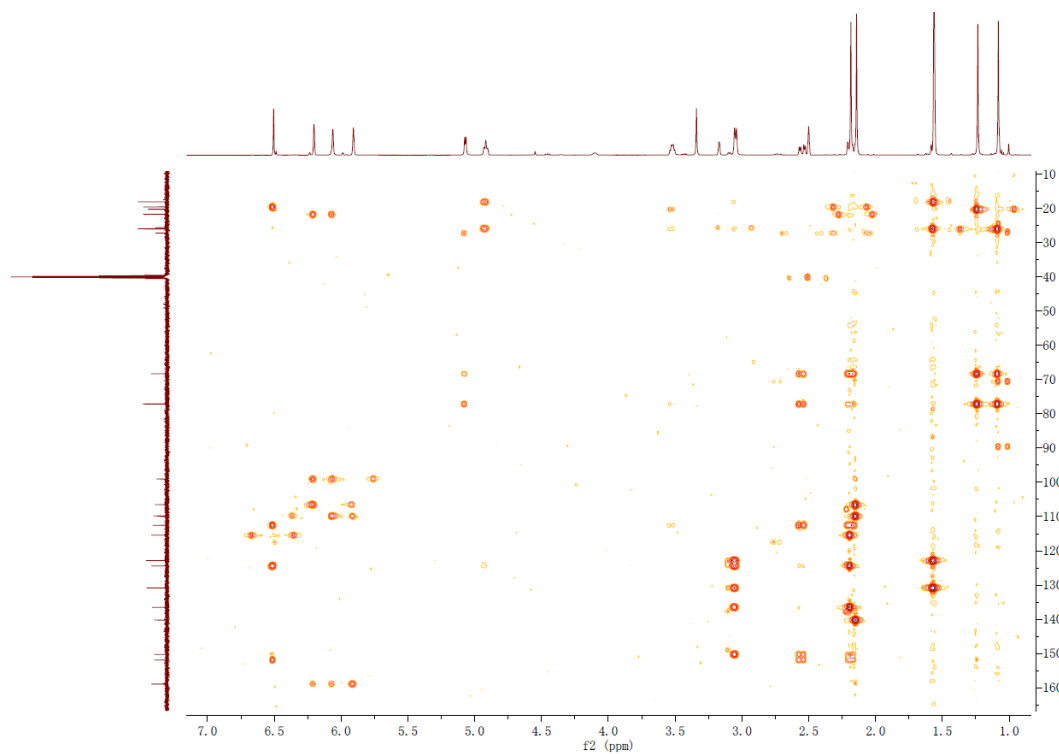

**Figure S6.** HMBC spectrum of compound **1**

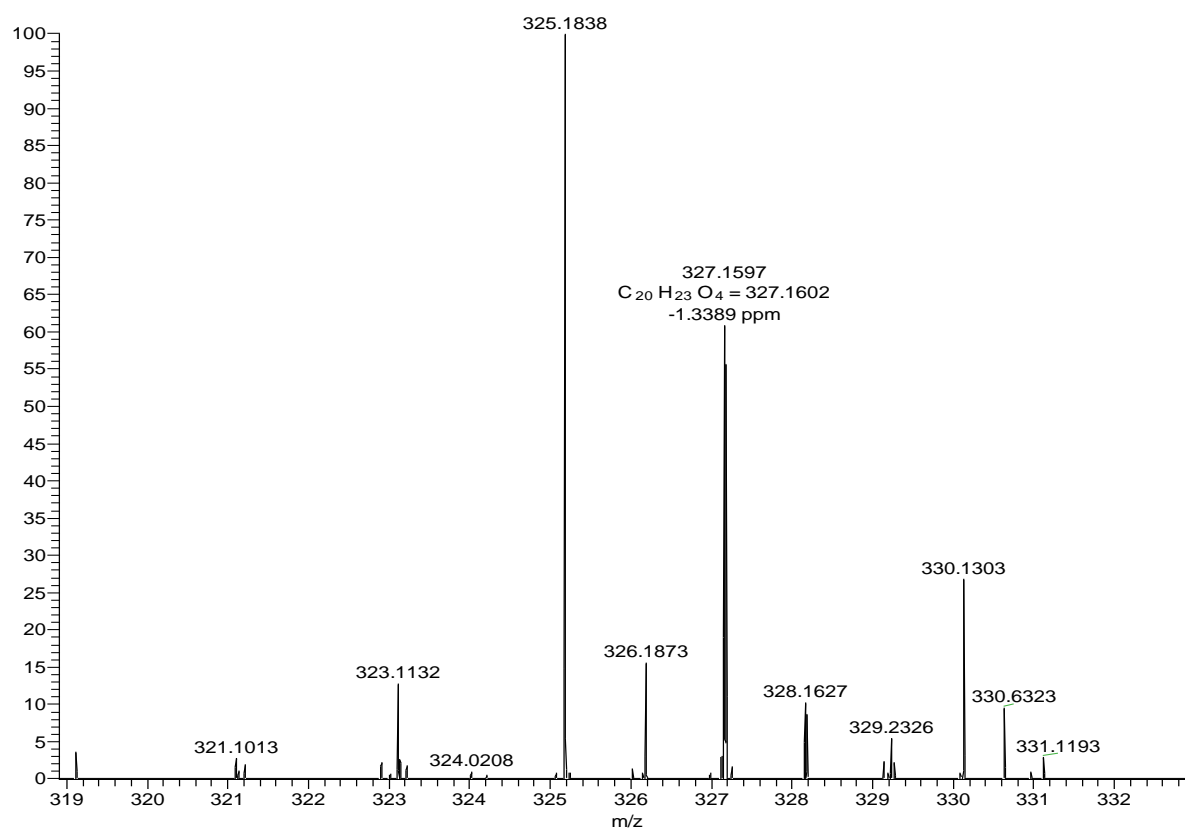

Figure S7. HRESIMS spectrum of compound 2

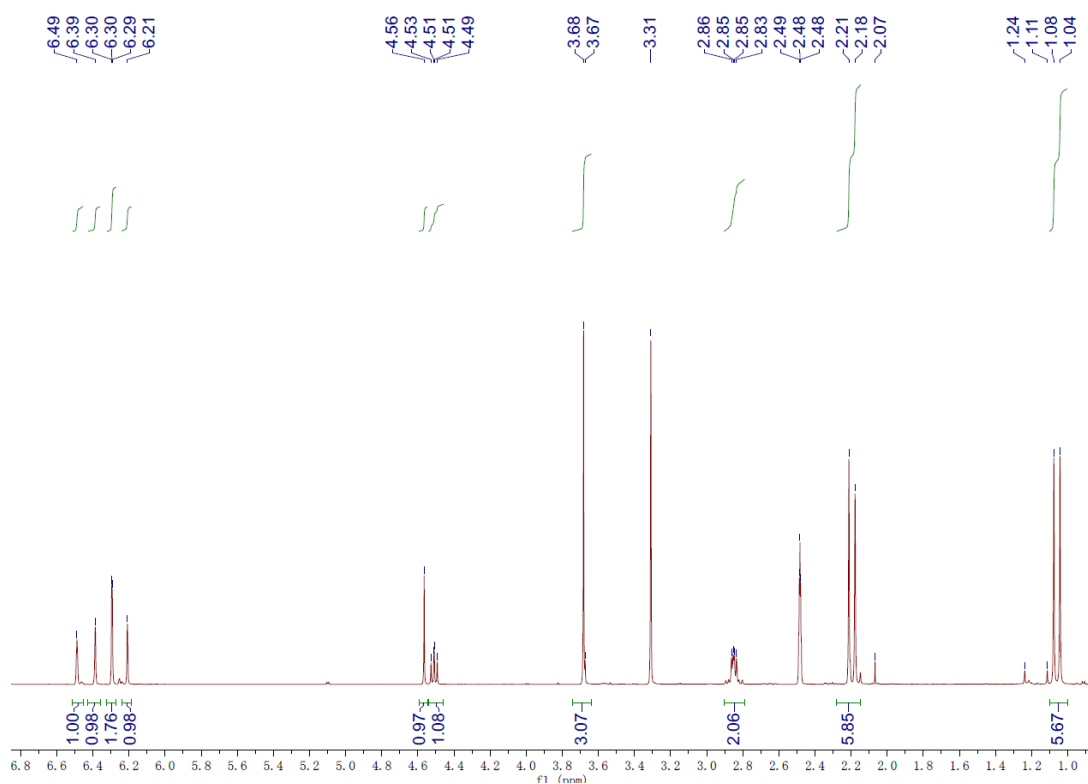

Figure S8. <sup>1</sup>H NMR (500 MHz, DMSO-d<sub>6</sub>) spectrum of compound 2

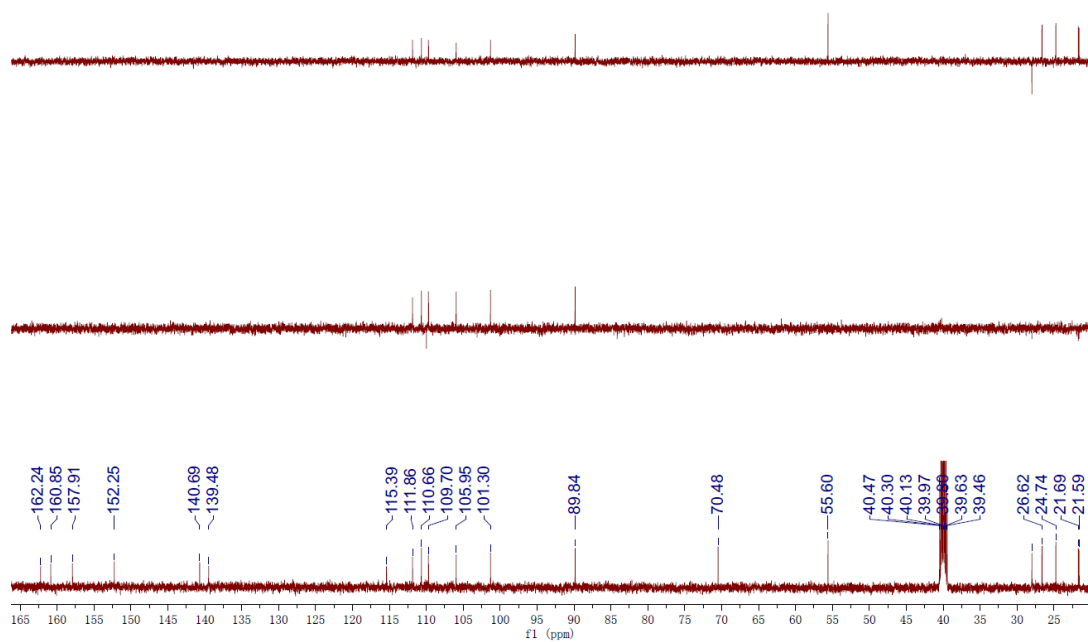

**Figure S9.**  $^{13}\text{C}$  NMR (125 MHz, DMSO- $d_6$ ) and DEPT spectra of compound **2**

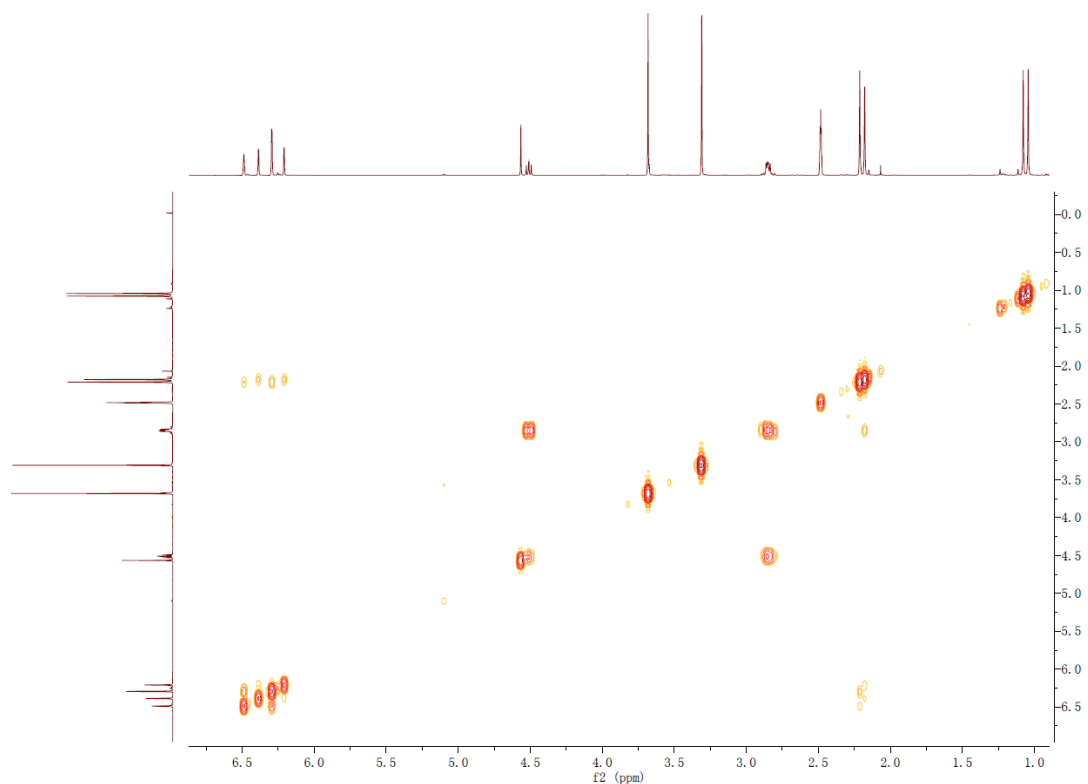

**Figure S10.** COSY spectrum of compound **2**

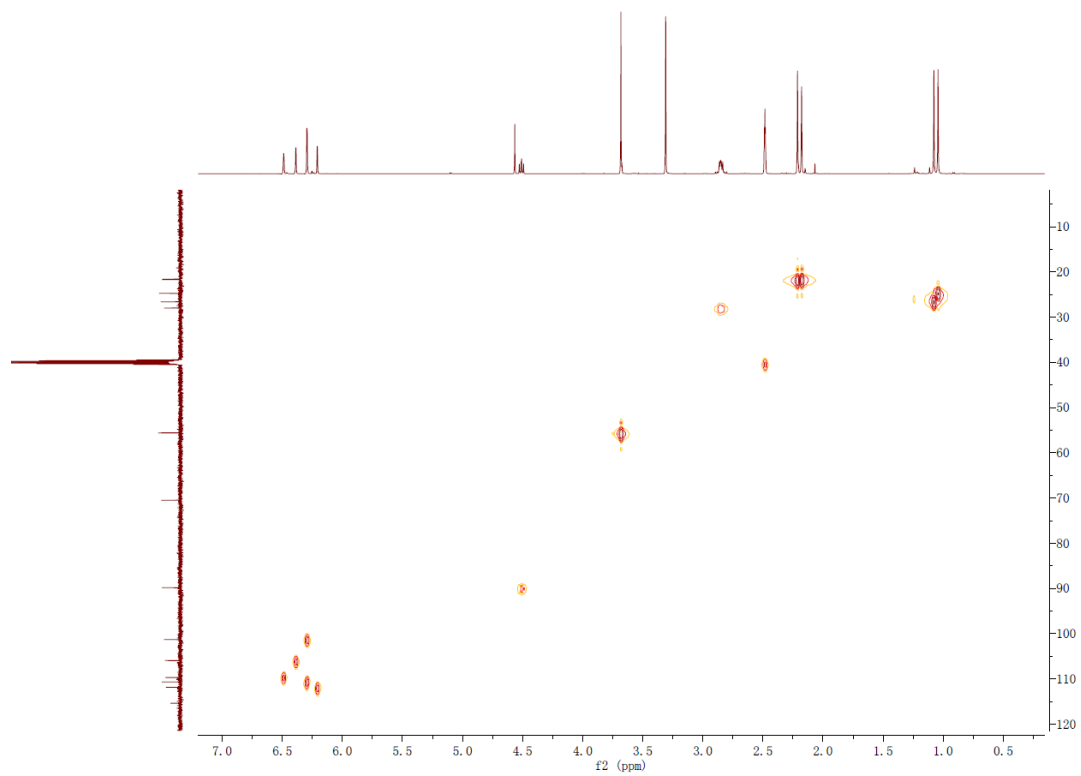

**Figure S11.** HSQC spectrum of compound **2**

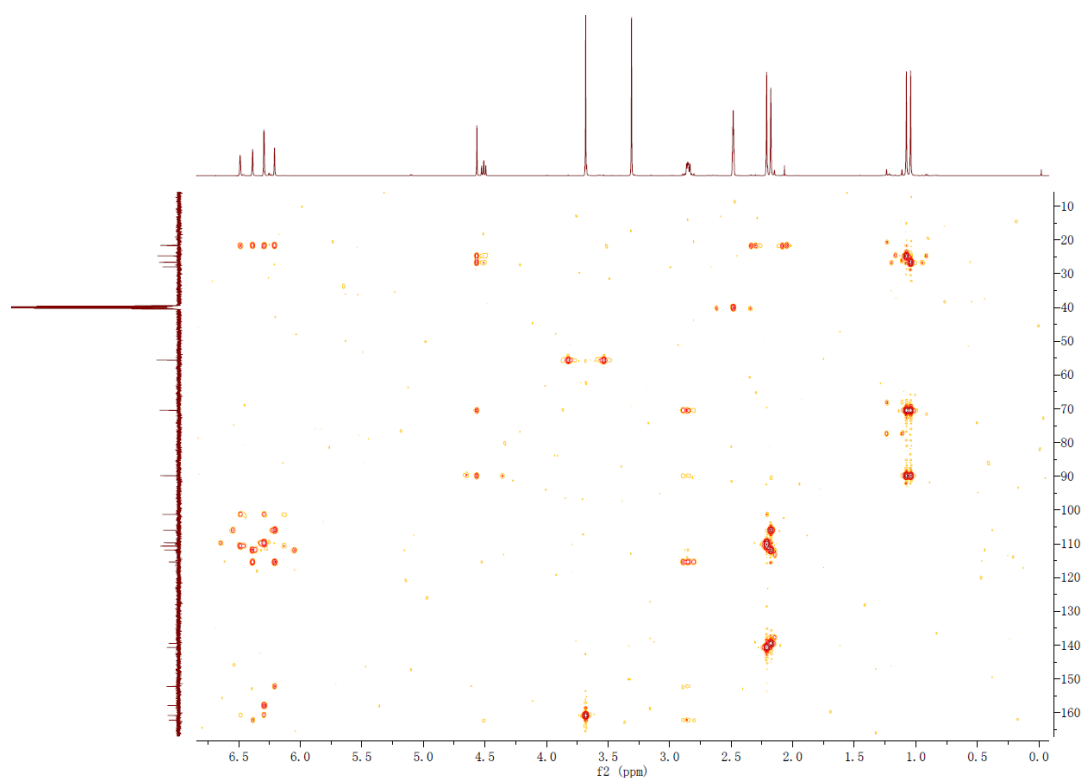

**Figure S12.** HMBC spectrum of compound **2**



20181112-AT-30\_181112092546 #31 RT: 0.49 AV: 1 SB: 5 0.11-0.18 NL: 7.25E5  
T: FTMS - p ESI Full ms [150.00-1000.00]

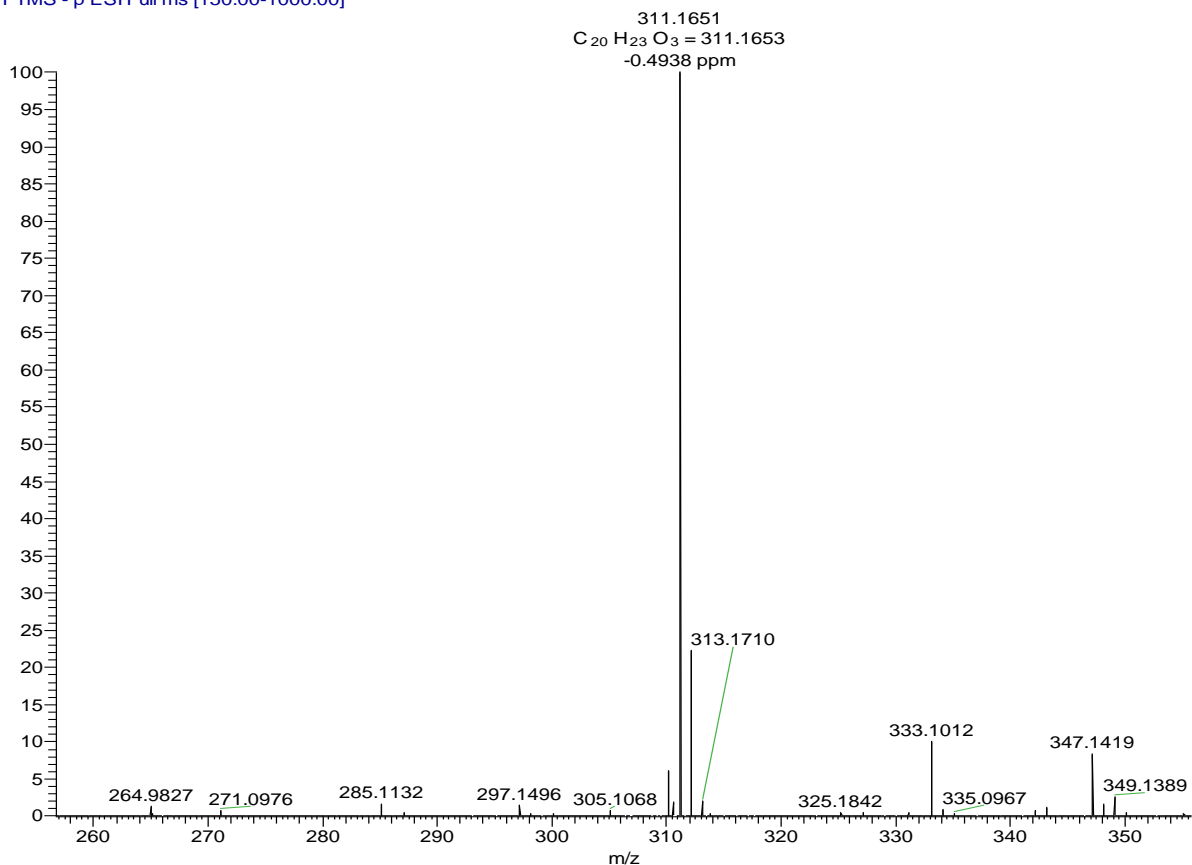

Figure S13. HRESIMS spectrum of compound 3

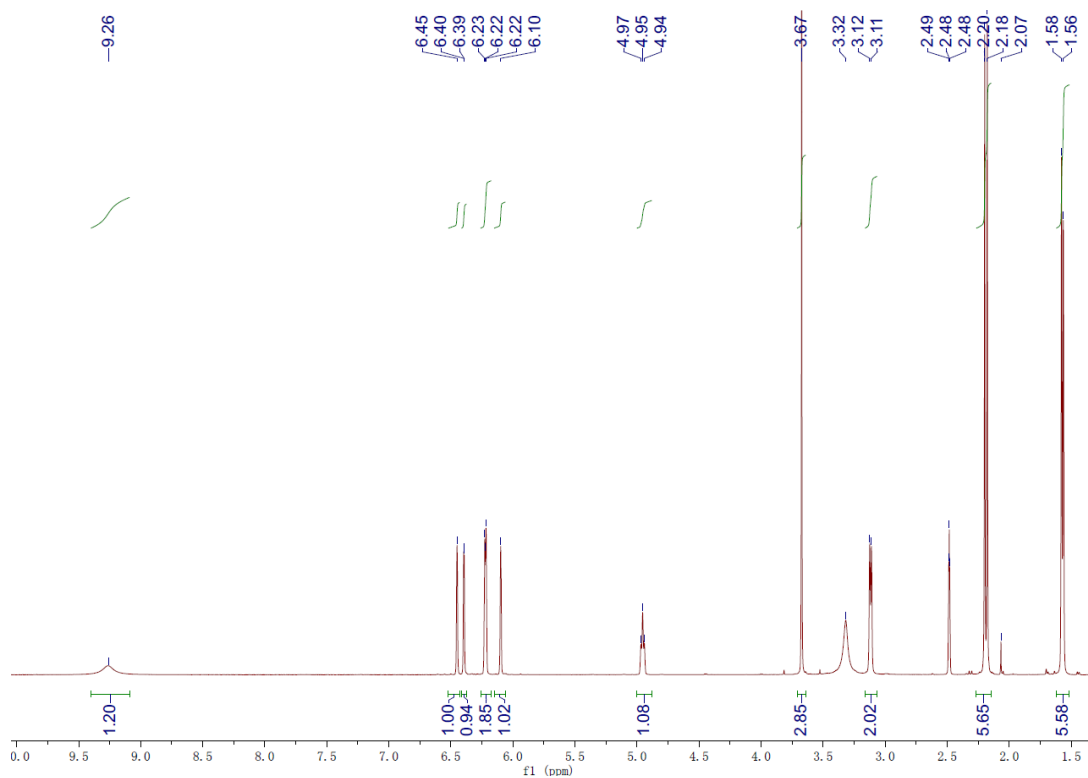

Figure S14. <sup>1</sup>H NMR (500 MHz, DMSO-*d*<sub>6</sub>) spectrum of compound 3



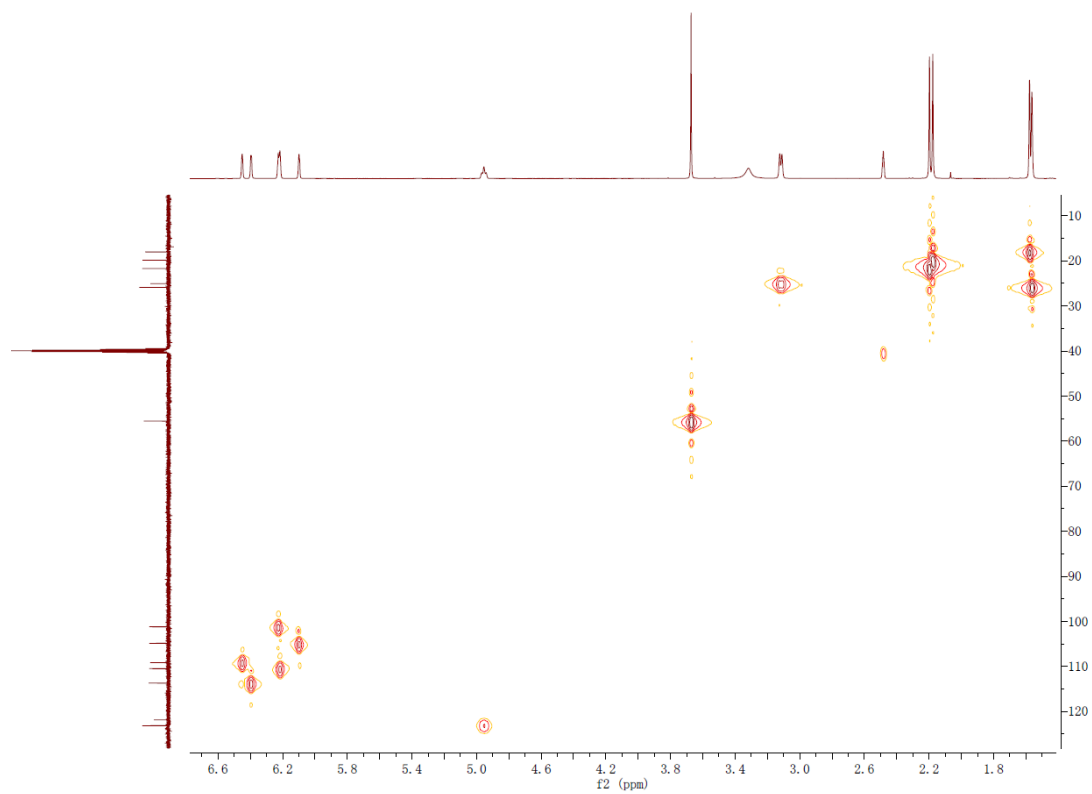

**Figure S17.** HSQC spectrum of compound **3**

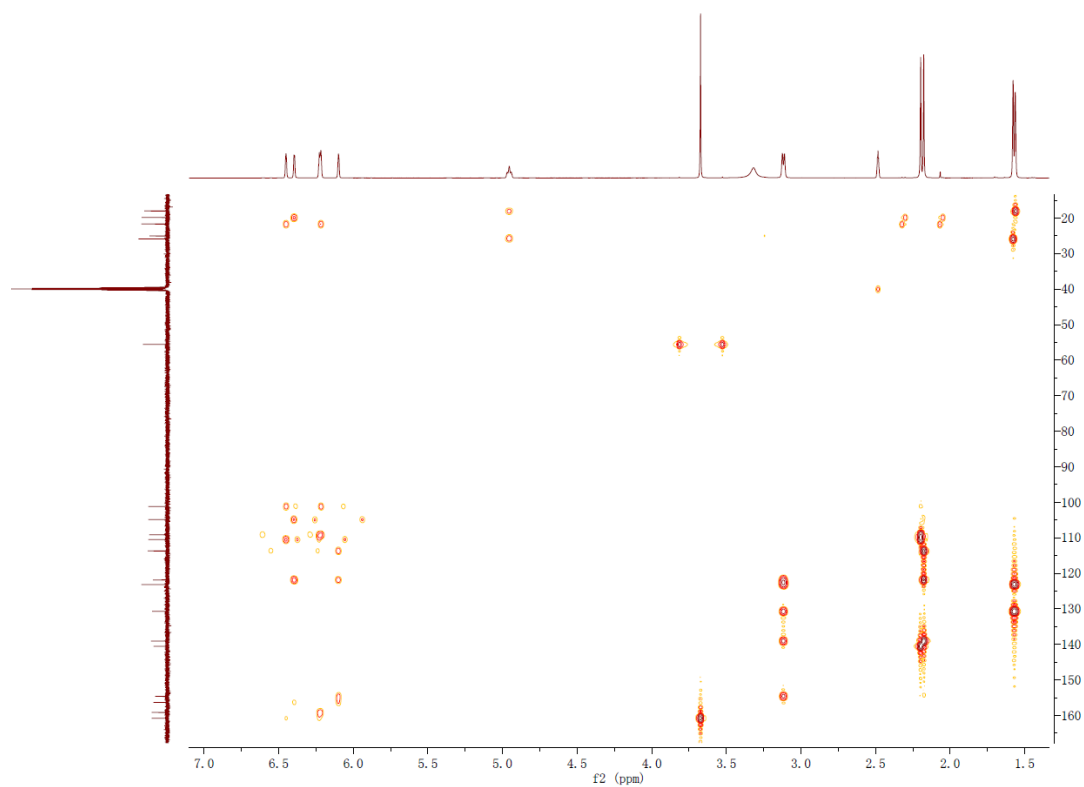

**Figure S18.** HMBC spectrum of compound **3**

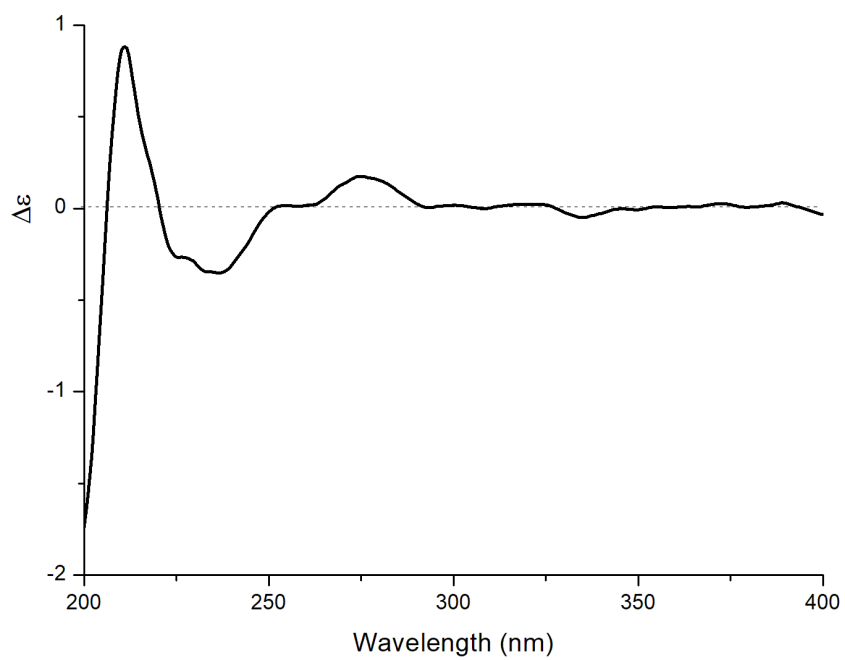

**Figure S19.** ECD spectrum of compound **2**

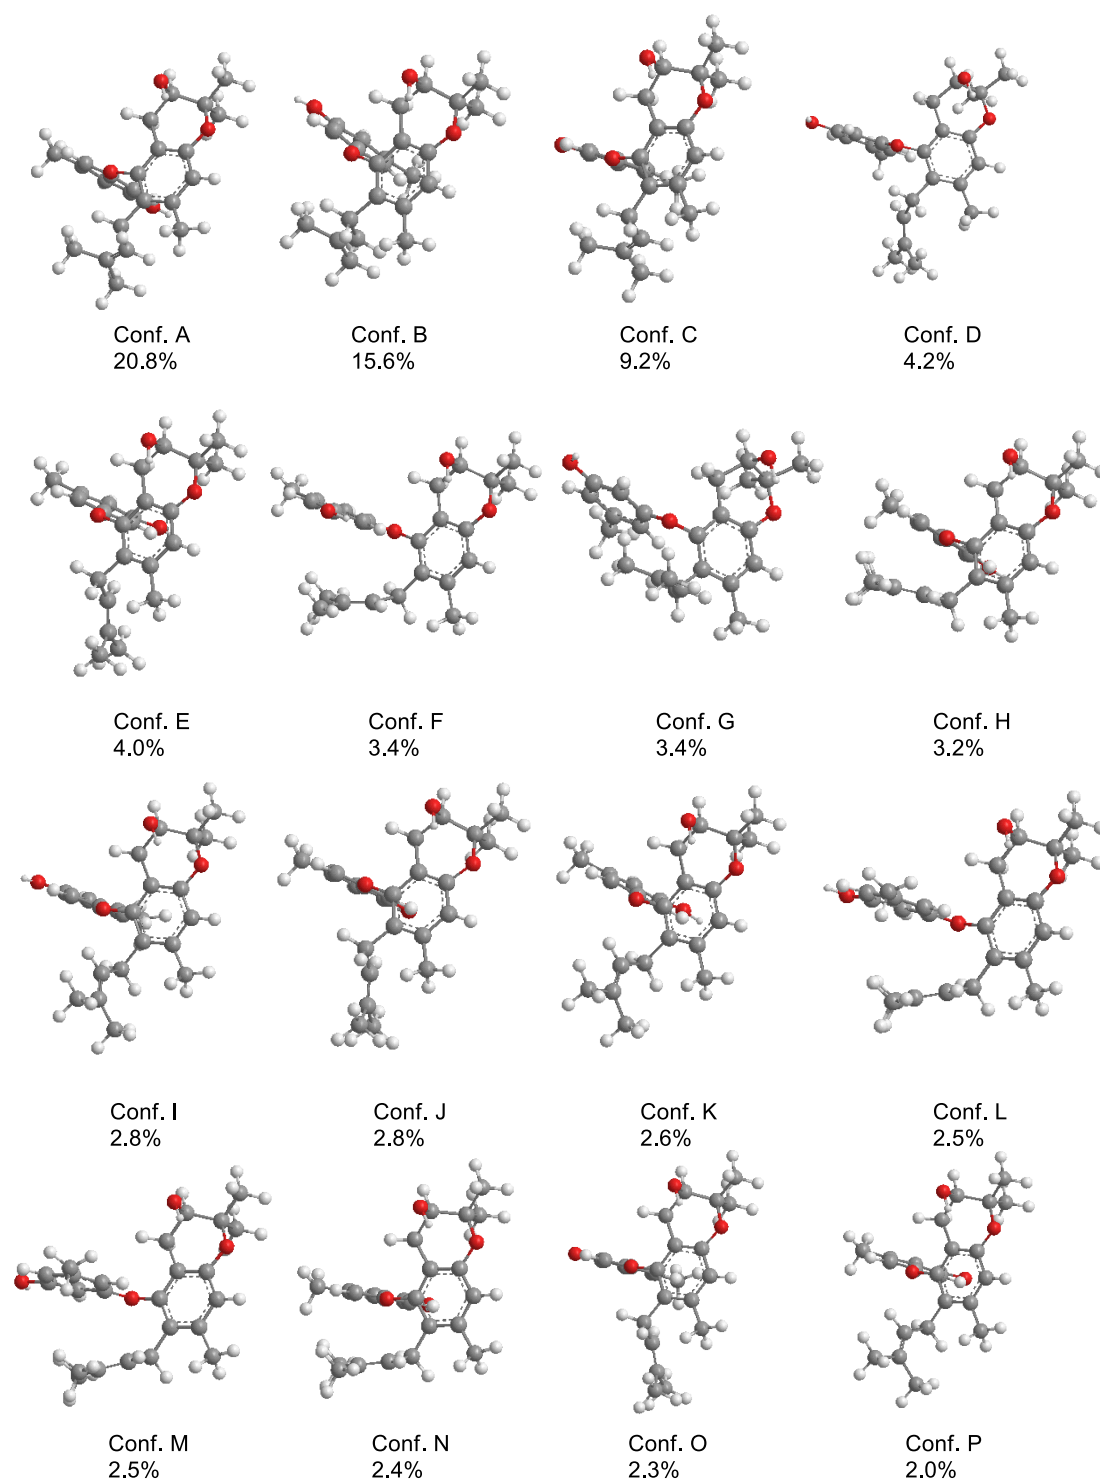

**Figure S20.** Structure and population of the low-energy conformers (>2%) of 8R-1

**Table S1.** Cartesian coordinates of the low-energy conformers ( $\geq 2\%$ ) of **1**

| (8 <i>R</i> )- <b>1</b> , Conf. A |      | Standard Orientation<br>(Ångstroms) |         |         |
|-----------------------------------|------|-------------------------------------|---------|---------|
| No.                               | Atom | X                                   | Y       | Z       |
| 1                                 | C    | -4.255                              | -2.126  | 3.725   |
| 2                                 | C    | -4.7047                             | -3.1605 | 2.8974  |
| 3                                 | C    | -3.8038                             | -3.8515 | 2.0932  |
| 4                                 | C    | -2.4492                             | -3.5336 | 2.093   |
| 5                                 | C    | -1.9895                             | -2.5061 | 2.9203  |
| 6                                 | C    | -2.8886                             | -1.8167 | 3.742   |
| 7                                 | O    | -0.6699                             | -2.1142 | 3.0347  |
| 8                                 | C    | 0.1899                              | -2.4334 | 2.0028  |
| 9                                 | C    | 0.1638                              | -1.6703 | 0.8182  |
| 10                                | C    | 1.0407                              | -2.0137 | -0.2094 |
| 11                                | C    | 1.9639                              | -3.0456 | -0.0374 |
| 12                                | C    | 2.0296                              | -3.7767 | 1.1593  |
| 13                                | C    | 1.1371                              | -3.4636 | 2.2081  |
| 14                                | C    | -5.2099                             | -1.4042 | 4.6278  |
| 15                                | O    | -4.2944                             | -4.8571 | 1.3116  |
| 16                                | C    | 1.1681                              | -4.2165 | 3.5285  |
| 17                                | C    | 0.2954                              | -5.4455 | 3.5177  |
| 18                                | C    | 3.078                               | -4.8493 | 1.2867  |
| 19                                | O    | 1.1045                              | -1.372  | -1.4166 |
| 20                                | C    | 0.0134                              | -0.489  | -1.7477 |
| 21                                | C    | -0.4                                | 0.3677  | -0.5311 |
| 22                                | C    | -0.787                              | -0.5124 | 0.6555  |
| 23                                | O    | 0.6663                              | 1.2436  | -0.1299 |
| 24                                | C    | 0.5418                              | 0.4132  | -2.8752 |
| 25                                | C    | -1.1541                             | -1.3213 | -2.3046 |
| 26                                | C    | -0.7023                             | -5.7726 | 4.3637  |
| 27                                | C    | -1.1655                             | -4.9464 | 5.5322  |
| 28                                | C    | -1.4711                             | -7.0558 | 4.1808  |
| 29                                | H    | -5.7557                             | -3.4379 | 2.8792  |
| 30                                | H    | -1.7596                             | -4.0936 | 1.472   |
| 31                                | H    | -2.5145                             | -1.0319 | 4.3959  |
| 32                                | H    | 2.6481                              | -3.2718 | -0.8537 |
| 33                                | H    | -4.8844                             | -0.3722 | 4.7952  |
| 34                                | H    | -6.2102                             | -1.3609 | 4.1841  |
| 35                                | H    | -5.2726                             | -1.9168 | 5.5926  |
| 36                                | H    | -3.5503                             | -5.2767 | 0.8486  |
| 37                                | H    | 0.9201                              | -3.5289 | 4.3419  |
| 38                                | H    | 2.1955                              | -4.5279 | 3.7514  |

|    |   |         |         |         |
|----|---|---------|---------|---------|
| 39 | H | 0.5277  | -6.1453 | 2.7157  |
| 40 | H | 2.6255  | -5.8049 | 1.5661  |
| 41 | H | 3.605   | -5.0104 | 0.3399  |
| 42 | H | 3.8238  | -4.5619 | 2.0345  |
| 43 | H | -1.2438 | 1.0183  | -0.788  |
| 44 | H | -1.7969 | -0.9077 | 0.4998  |
| 45 | H | -0.7867 | 0.0939  | 1.5692  |
| 46 | H | 1.4565  | 0.685   | -0.0034 |
| 47 | H | -0.2085 | 1.1464  | -3.1887 |
| 48 | H | 0.8282  | -0.1835 | -3.7493 |
| 49 | H | 1.4473  | 0.9484  | -2.5679 |
| 50 | H | -1.9916 | -0.6823 | -2.603  |
| 51 | H | -0.8328 | -1.9007 | -3.1782 |
| 52 | H | -1.5232 | -2.0544 | -1.5803 |
| 53 | H | -2.2292 | -4.7083 | 5.4268  |
| 54 | H | -0.6306 | -4.0015 | 5.642   |
| 55 | H | -1.0315 | -5.5078 | 6.4629  |
| 56 | H | -2.5325 | -6.8412 | 4.0176  |
| 57 | H | -1.1149 | -7.6364 | 3.3234  |
| 58 | H | -1.3753 | -7.6854 | 5.0714  |

| (8R)-1,Conf. B |      | Standard Orientation<br>(Ångstroms) |         |         |
|----------------|------|-------------------------------------|---------|---------|
| No.            | Atom | X                                   | Y       | Z       |
| 1              | C    | -3.6738                             | -4.2476 | 1.6862  |
| 2              | C    | -4.6751                             | -3.6611 | 2.4683  |
| 3              | C    | -4.3589                             | -2.6303 | 3.3469  |
| 4              | C    | -3.0525                             | -2.1708 | 3.4691  |
| 5              | C    | -2.044                              | -2.7509 | 2.6962  |
| 6              | C    | -2.353                              | -3.7943 | 1.8156  |
| 7              | O    | -0.7775                             | -2.242  | 2.9082  |
| 8              | C    | 0.1846                              | -2.4784 | 1.9469  |
| 9              | C    | 0.1866                              | -1.7101 | 0.7656  |
| 10             | C    | 1.1701                              | -1.9663 | -0.1887 |
| 11             | C    | 2.163                               | -2.9157 | 0.0547  |
| 12             | C    | 2.1951                              | -3.6505 | 1.2505  |
| 13             | C    | 1.1982                              | -3.4248 | 2.2251  |
| 14             | C    | -3.994                              | -5.3938 | 0.7738  |
| 15             | O    | -5.3726                             | -2.0929 | 4.085   |
| 16             | C    | 1.1876                              | -4.1862 | 3.541   |
| 17             | C    | 0.4171                              | -5.4787 | 3.4577  |
| 18             | C    | 3.3163                              | -4.6332 | 1.4578  |

---

|    |   |         |         |         |
|----|---|---------|---------|---------|
| 19 | O | 1.2739  | -1.3099 | -1.3853 |
| 20 | C | 0.1361  | -0.5289 | -1.8037 |
| 21 | C | -0.449  | 0.2786  | -0.6245 |
| 22 | C | -0.8481 | -0.6409 | 0.5276  |
| 23 | O | 0.4982  | 1.2441  | -0.1387 |
| 24 | C | 0.6677  | 0.4251  | -2.8861 |
| 25 | C | -0.9023 | -1.4607 | -2.4514 |
| 26 | C | -0.602  | -5.8988 | 4.2343  |
| 27 | C | -1.1969 | -5.1366 | 5.386   |
| 28 | C | -1.2594 | -7.2304 | 3.9782  |
| 29 | H | -5.7036 | -4.007  | 2.4016  |
| 30 | H | -2.7999 | -1.3707 | 4.1571  |
| 31 | H | -1.5715 | -4.2772 | 1.2348  |
| 32 | H | 2.9267  | -3.0752 | -0.7047 |
| 33 | H | -3.8543 | -6.3421 | 1.3018  |
| 34 | H | -5.0285 | -5.3355 | 0.4193  |
| 35 | H | -3.347  | -5.3804 | -0.1096 |
| 36 | H | -5.0067 | -1.3937 | 4.6515  |
| 37 | H | 0.8239  | -3.5273 | 4.3343  |
| 38 | H | 2.216   | -4.4188 | 3.8413  |
| 39 | H | 0.748   | -6.1398 | 2.6572  |
| 40 | H | 2.9245  | -5.6253 | 1.6994  |
| 41 | H | 3.927   | -4.7423 | 0.555   |
| 42 | H | 3.9747  | -4.291  | 2.2623  |
| 43 | H | -1.3249 | 0.8523  | -0.9484 |
| 44 | H | -1.803  | -1.1238 | 0.292   |
| 45 | H | -0.9748 | -0.0435 | 1.4384  |
| 46 | H | 1.3248  | 0.7584  | 0.044   |
| 47 | H | -0.1195 | 1.0882  | -3.2597 |
| 48 | H | 1.0768  | -0.1372 | -3.7338 |
| 49 | H | 1.4925  | 1.0393  | -2.5079 |
| 50 | H | -1.768  | -0.8987 | -2.8168 |
| 51 | H | -0.4607 | -2.0031 | -3.2956 |
| 52 | H | -1.26   | -2.2286 | -1.7581 |
| 53 | H | -2.2656 | -4.9696 | 5.2149  |
| 54 | H | -0.7377 | -4.1604 | 5.551   |
| 55 | H | -1.0844 | -5.7107 | 6.3118  |
| 56 | H | -2.3221 | -7.091  | 3.7539  |
| 57 | H | -0.8095 | -7.7618 | 3.1329  |
| 58 | H | -1.1703 | -7.8731 | 4.8601  |



| (8R)-1,Conf. C |      | Standard Orientation<br>(Ångstroms) |         |         |
|----------------|------|-------------------------------------|---------|---------|
| No.            | Atom | X                                   | Y       | Z       |
| 1              | C    | -3.6346                             | -4.2169 | 1.7237  |
| 2              | C    | -4.6365                             | -3.6386 | 2.5129  |
| 3              | C    | -4.3161                             | -2.604  | 3.3882  |
| 4              | C    | -3.0118                             | -2.1382 | 3.4977  |
| 5              | C    | -2.0042                             | -2.7097 | 2.7203  |
| 6              | C    | -2.3151                             | -3.7547 | 1.8426  |
| 7              | O    | -0.7395                             | -2.194  | 2.9233  |
| 8              | C    | 0.2207                              | -2.4369 | 1.962   |
| 9              | C    | 0.2222                              | -1.6729 | 0.7781  |
| 10             | C    | 1.2002                              | -1.9379 | -0.1792 |
| 11             | C    | 2.1901                              | -2.8905 | 0.0646  |
| 12             | C    | 2.2243                              | -3.6195 | 1.2639  |
| 13             | C    | 1.2316                              | -3.3859 | 2.241   |
| 14             | C    | -3.9492                             | -5.366  | 0.8121  |
| 15             | O    | -5.2674                             | -2.0176 | 4.1706  |
| 16             | C    | 1.2235                              | -4.1398 | 3.5611  |
| 17             | C    | 0.4547                              | -5.4342 | 3.4869  |
| 18             | C    | 3.3438                              | -4.6038 | 1.4726  |
| 19             | O    | 1.301                               | -1.2882 | -1.3796 |
| 20             | C    | 0.1654                              | -0.5024 | -1.7949 |
| 21             | C    | -0.4094                             | 0.3137  | -0.6166 |
| 22             | C    | -0.8074                             | -0.5982 | 0.5421  |
| 23             | O    | 0.5454                              | 1.2774  | -0.1425 |
| 24             | C    | 0.6964                              | 0.4437  | -2.8846 |
| 25             | C    | -0.8817                             | -1.4312 | -2.4329 |
| 26             | C    | -0.5623                             | -5.8507 | 4.2682  |
| 27             | C    | -1.1567                             | -5.0804 | 5.4151  |
| 28             | C    | -1.2166                             | -7.1858 | 4.0239  |
| 29             | H    | -5.6563                             | -4.005  | 2.4407  |
| 30             | H    | -2.779                              | -1.3345 | 4.19    |
| 31             | H    | -1.5348                             | -4.2327 | 1.2561  |
| 32             | H    | 2.9503                              | -3.0562 | -0.697  |
| 33             | H    | -4.9865                             | -5.318  | 0.4646  |
| 34             | H    | -3.3084                             | -5.3452 | -0.0758 |
| 35             | H    | -3.7962                             | -6.3132 | 1.3384  |
| 36             | H    | -6.1218                             | -2.4438 | 3.9937  |
| 37             | H    | 0.8607                              | -3.4769 | 4.3516  |
| 38             | H    | 2.2528                              | -4.3693 | 3.8608  |
| 39             | H    | 0.7861                              | -6.1001 | 2.6908  |
| 40             | H    | 4.0058                              | -4.259  | 2.273   |

|    |   |         |         |         |
|----|---|---------|---------|---------|
| 41 | H | 2.9507  | -5.5938 | 1.7206  |
| 42 | H | 3.9512  | -4.719  | 0.5683  |
| 43 | H | -1.2843 | 0.89    | -0.9388 |
| 44 | H | -1.7666 | -1.0762 | 0.3146  |
| 45 | H | -0.9247 | 0.0037  | 1.4512  |
| 46 | H | 1.3646  | 0.7861  | 0.0574  |
| 47 | H | -0.089  | 1.1096  | -3.2568 |
| 48 | H | 1.0976  | -0.1248 | -3.732  |
| 49 | H | 1.5268  | 1.0549  | -2.5137 |
| 50 | H | -1.7463 | -0.8659 | -2.7962 |
| 51 | H | -0.4478 | -1.9799 | -3.2771 |
| 52 | H | -1.24   | -2.194  | -1.7344 |
| 53 | H | -0.7018 | -4.1006 | 5.5696  |
| 54 | H | -1.0382 | -5.6456 | 6.3457  |
| 55 | H | -2.2268 | -4.9203 | 5.2463  |
| 56 | H | -2.2801 | -7.0509 | 3.8008  |
| 57 | H | -0.7672 | -7.7226 | 3.1818  |
| 58 | H | -1.124  | -7.8213 | 4.9106  |

| (8R)-1, Conf. D |      | Standard Orientation<br>(Ångstroms) |         |         |
|-----------------|------|-------------------------------------|---------|---------|
| No.             | Atom | X                                   | Y       | Z       |
| 1               | C    | -3.9847                             | -3.9304 | 1.5029  |
| 2               | C    | -4.9951                             | -3.4085 | 2.3182  |
| 3               | C    | -4.6942                             | -2.4309 | 3.2604  |
| 4               | C    | -3.3939                             | -1.9629 | 3.4144  |
| 5               | C    | -2.374                              | -2.4823 | 2.6132  |
| 6               | C    | -2.6695                             | -3.4704 | 1.6656  |
| 7               | O    | -1.1202                             | -1.9543 | 2.8567  |
| 8               | C    | -0.0886                             | -2.3108 | 2.0131  |
| 9               | C    | 0.0681                              | -1.6181 | 0.7963  |
| 10              | C    | 1.0992                              | -2.0051 | -0.0573 |
| 11              | C    | 1.9908                              | -3.0089 | 0.3212  |
| 12              | C    | 1.8777                              | -3.6592 | 1.5609  |
| 13              | C    | 0.8251                              | -3.3048 | 2.4332  |
| 14              | C    | -4.2912                             | -5.0139 | 0.512   |
| 15              | O    | -5.7168                             | -1.9529 | 4.0264  |
| 16              | C    | 0.6682                              | -3.9663 | 3.7933  |
| 17              | C    | 0.0012                              | -5.3146 | 3.7207  |
| 18              | C    | 2.8797                              | -4.7294 | 1.9014  |
| 19              | O    | 1.3434                              | -1.4375 | -1.2783 |
| 20              | C    | 0.3036                              | -0.606  | -1.8327 |

|    |   |         |         |         |
|----|---|---------|---------|---------|
| 21 | C | -0.3079 | 0.3156  | -0.7545 |
| 22 | C | -0.8624 | -0.4965 | 0.414   |
| 23 | O | 0.6694  | 1.2413  | -0.2515 |
| 24 | C | 0.9873  | 0.236   | -2.9227 |
| 25 | C | -0.7499 | -1.5017 | -2.5066 |
| 26 | C | 0.4452  | -6.4991 | 4.1871  |
| 27 | C | 1.7472  | -6.7247 | 4.9039  |
| 28 | C | -0.385  | -7.7453 | 4.0136  |
| 29 | H | -6.0193 | -3.7612 | 2.2257  |
| 30 | H | -3.1555 | -1.2011 | 4.1497  |
| 31 | H | -1.8859 | -3.9    | 1.0466  |
| 32 | H | 2.7912  | -3.2795 | -0.3655 |
| 33 | H | -4.1424 | -5.9951 | 0.9731  |
| 34 | H | -5.3256 | -4.942  | 0.1598  |
| 35 | H | -3.6429 | -4.9322 | -0.3667 |
| 36 | H | -5.3606 | -1.2913 | 4.6422  |
| 37 | H | 0.0688  | -3.3308 | 4.4564  |
| 38 | H | 1.6468  | -4.0025 | 4.2791  |
| 39 | H | -0.9747 | -5.2948 | 3.2368  |
| 40 | H | 2.3968  | -5.7104 | 1.9194  |
| 41 | H | 3.6849  | -4.7739 | 1.1598  |
| 42 | H | 3.3516  | -4.5285 | 2.8676  |
| 43 | H | -1.1106 | 0.9274  | -1.1818 |
| 44 | H | -1.8307 | -0.9251 | 0.1327  |
| 45 | H | -1.0123 | 0.1653  | 1.2754  |
| 46 | H | 1.4415  | 0.712   | 0.0247  |
| 47 | H | 0.2837  | 0.928   | -3.397  |
| 48 | H | 1.416   | -0.4076 | -3.7    |
| 49 | H | 1.8251  | 0.813   | -2.5156 |
| 50 | H | -1.54   | -0.9044 | -2.9735 |
| 51 | H | -0.2874 | -2.1276 | -3.2788 |
| 52 | H | -1.217  | -2.1958 | -1.8006 |
| 53 | H | 1.5615  | -7.1632 | 5.8902  |
| 54 | H | 2.3248  | -5.8122 | 5.061   |
| 55 | H | 2.3748  | -7.4167 | 4.3324  |
| 56 | H | -0.6351 | -8.1732 | 4.9899  |
| 57 | H | -1.3245 | -7.5506 | 3.4857  |
| 58 | H | 0.1704  | -8.4926 | 3.4373  |

| (8R)-1, Conf. E |      | Standard Orientation<br>(Ångstroms) |   |   |
|-----------------|------|-------------------------------------|---|---|
| No.             | Atom | X                                   | Y | Z |

|    |   |         |         |         |
|----|---|---------|---------|---------|
| 1  | C | -4.5784 | -1.8931 | 3.6624  |
| 2  | C | -5.0098 | -2.8887 | 2.7795  |
| 3  | C | -4.095  | -3.5268 | 1.9481  |
| 4  | C | -2.7431 | -3.1973 | 1.9788  |
| 5  | C | -2.2995 | -2.2102 | 2.8638  |
| 6  | C | -3.2155 | -1.5706 | 3.7071  |
| 7  | O | -0.9894 | -1.7933 | 3.0068  |
| 8  | C | -0.0612 | -2.2445 | 2.0916  |
| 9  | C | 0.0474  | -1.5901 | 0.8485  |
| 10 | C | 0.9659  | -2.0785 | -0.0783 |
| 11 | C | 1.8003  | -3.1471 | 0.2499  |
| 12 | C | 1.7421  | -3.7611 | 1.5118  |
| 13 | C | 0.8025  | -3.3016 | 2.4606  |
| 14 | C | -5.5493 | -1.2267 | 4.5905  |
| 15 | O | -4.5702 | -4.4898 | 1.1058  |
| 16 | C | 0.7145  | -3.9149 | 3.8494  |
| 17 | C | -0.0778 | -5.1952 | 3.882   |
| 18 | C | 2.6809  | -4.9024 | 1.796   |
| 19 | O | 1.1512  | -1.5564 | -1.3295 |
| 20 | C | 0.1466  | -0.6418 | -1.8136 |
| 21 | C | -0.2903 | 0.3453  | -0.7089 |
| 22 | C | -0.8139 | -0.3985 | 0.5181  |
| 23 | O | 0.8017  | 1.1887  | -0.3081 |
| 24 | C | 0.8089  | 0.1208  | -2.973  |
| 25 | C | -1.0338 | -1.4489 | -2.3804 |
| 26 | C | 0.3032  | -6.4101 | 4.3257  |
| 27 | C | 1.6509  | -6.7494 | 4.8991  |
| 28 | C | -0.6546 | -7.5732 | 4.2785  |
| 29 | H | -6.058  | -3.1743 | 2.7366  |
| 30 | H | -2.0476 | -3.7132 | 1.3265  |
| 31 | H | -2.8578 | -0.813  | 4.4015  |
| 32 | H | 2.5145  | -3.4965 | -0.4941 |
| 33 | H | -5.2361 | -0.201  | 4.8121  |
| 34 | H | -6.5458 | -1.1713 | 4.1398  |
| 35 | H | -5.6155 | -1.7871 | 5.5281  |
| 36 | H | -3.8248 | -4.8641 | 0.6077  |
| 37 | H | 0.2417  | -3.2098 | 4.544   |
| 38 | H | 1.7266  | -4.0324 | 4.2456  |
| 39 | H | -1.0971 | -5.0885 | 3.5133  |
| 40 | H | 2.123   | -5.8375 | 1.8968  |
| 41 | H | 3.4033  | -5.0384 | 0.9836  |
| 42 | H | 3.2595  | -4.7134 | 2.705   |
| 43 | H | -1.0702 | 1.019   | -1.0821 |

|    |   |         |         |         |
|----|---|---------|---------|---------|
| 44 | H | -1.8347 | -0.7463 | 0.3254  |
| 45 | H | -0.8357 | 0.2866  | 1.374   |
| 46 | H | 1.5441  | 0.5984  | -0.0782 |
| 47 | H | 0.132   | 0.8665  | -3.4026 |
| 48 | H | 1.1132  | -0.5689 | -3.7692 |
| 49 | H | 1.7252  | 0.6259  | -2.6477 |
| 50 | H | -1.8049 | -0.79   | -2.7929 |
| 51 | H | -0.694  | -2.1235 | -3.175  |
| 52 | H | -1.4989 | -2.0895 | -1.6243 |
| 53 | H | 1.5377  | -7.1499 | 5.9121  |
| 54 | H | 2.3272  | -5.8953 | 4.9641  |
| 55 | H | 2.1405  | -7.5096 | 4.2814  |
| 56 | H | -0.8308 | -7.9604 | 5.2875  |
| 57 | H | -1.6258 | -7.297  | 3.8544  |
| 58 | H | -0.2412 | -8.3789 | 3.663   |

| (8R)-1, Conf. F |      | Standard Orientation<br>(Ångstroms) |         |         |
|-----------------|------|-------------------------------------|---------|---------|
| No.             | Atom | X                                   | Y       | Z       |
| 1               | C    | -4.6707                             | -3.4038 | 2.9454  |
| 2               | C    | -4.2041                             | -2.5644 | 3.9618  |
| 3               | C    | -2.8847                             | -2.1231 | 3.9498  |
| 4               | C    | -2.0044                             | -2.5092 | 2.9426  |
| 5               | C    | -2.4543                             | -3.3638 | 1.9334  |
| 6               | C    | -3.7824                             | -3.8083 | 1.9402  |
| 7               | O    | -1.6913                             | -3.8436 | 0.8862  |
| 8               | C    | -0.3822                             | -3.4223 | 0.7783  |
| 9               | C    | -0.1052                             | -2.2692 | 0.0172  |
| 10              | C    | 1.227                               | -1.8979 | -0.1608 |
| 11              | C    | 2.2538                              | -2.6335 | 0.4309  |
| 12              | C    | 1.9861                              | -3.7908 | 1.1788  |
| 13              | C    | 0.6477                              | -4.2149 | 1.3383  |
| 14              | C    | -6.0797                             | -3.915  | 2.9677  |
| 15              | O    | -2.4837                             | -1.3037 | 4.9653  |
| 16              | C    | 0.3085                              | -5.4884 | 2.0982  |
| 17              | C    | 0.1451                              | -5.2586 | 3.5789  |
| 18              | C    | 3.1498                              | -4.5659 | 1.7371  |
| 19              | O    | 1.6339                              | -0.8135 | -0.8904 |
| 20              | C    | 0.6717                              | -0.2483 | -1.8044 |
| 21              | C    | -0.7147                             | -0.1254 | -1.1374 |
| 22              | C    | -1.2113                             | -1.4802 | -0.6352 |
| 23              | O    | -0.6683                             | 0.7866  | -0.0269 |

|    |   |         |         |         |
|----|---|---------|---------|---------|
| 24 | C | 1.2139  | 1.1458  | -2.1617 |
| 25 | C | 0.6349  | -1.0924 | -3.0896 |
| 26 | C | -0.8446 | -5.691  | 4.386   |
| 27 | C | -2.0131 | -6.5366 | 3.9612  |
| 28 | C | -0.8516 | -5.3299 | 5.8492  |
| 29 | H | -4.863  | -2.2495 | 4.767   |
| 30 | H | -0.9791 | -2.1595 | 2.9588  |
| 31 | H | -4.1202 | -4.4796 | 1.1536  |
| 32 | H | 3.2814  | -2.3069 | 0.2793  |
| 33 | H | -6.4481 | -4.0883 | 1.9511  |
| 34 | H | -6.1277 | -4.8546 | 3.5266  |
| 35 | H | -6.7518 | -3.189  | 3.437   |
| 36 | H | -1.5529 | -1.0672 | 4.8193  |
| 37 | H | 1.106   | -6.2258 | 1.9491  |
| 38 | H | -0.5735 | -5.9492 | 1.6446  |
| 39 | H | 0.9365  | -4.6599 | 4.0284  |
| 40 | H | 4.0892  | -4.013  | 1.6276  |
| 41 | H | 3.0171  | -4.7558 | 2.8058  |
| 42 | H | 3.2598  | -5.5162 | 1.2054  |
| 43 | H | -1.4462 | 0.29    | -1.8399 |
| 44 | H | -1.6025 | -2.0685 | -1.4734 |
| 45 | H | -2.026  | -1.3125 | 0.0768  |
| 46 | H | 0.0804  | 0.5072  | 0.5325  |
| 47 | H | 0.5367  | 1.68    | -2.8362 |
| 48 | H | 2.1947  | 1.0695  | -2.6459 |
| 49 | H | 1.3692  | 1.7569  | -1.2655 |
| 50 | H | -0.0563 | -0.6673 | -3.8248 |
| 51 | H | 1.6314  | -1.1482 | -3.5434 |
| 52 | H | 0.3358  | -2.1277 | -2.898  |
| 53 | H | -2.0155 | -7.4778 | 4.5213  |
| 54 | H | -2.0069 | -6.7926 | 2.9003  |
| 55 | H | -2.9523 | -6.0138 | 4.1687  |
| 56 | H | -0.8198 | -6.2356 | 6.4635  |
| 57 | H | 0.0051  | -4.7079 | 6.1291  |
| 58 | H | -1.7608 | -4.772  | 6.0969  |

| (8R)-1,Conf. G |      | Standard Orientation<br>(Ångstroms) |         |        |
|----------------|------|-------------------------------------|---------|--------|
| No.            | Atom | X                                   | Y       | Z      |
| 1              | C    | -4.1737                             | -4.0593 | 0.9126 |
| 2              | C    | -5.1095                             | -3.6344 | 1.8628 |
| 3              | C    | -4.6854                             | -2.9817 | 3.0154 |

|    |   |         |         |         |
|----|---|---------|---------|---------|
| 4  | C | -3.3351 | -2.7462 | 3.2468  |
| 5  | C | -2.3914 | -3.1695 | 2.3079  |
| 6  | C | -2.8093 | -3.8368 | 1.1501  |
| 7  | O | -1.0781 | -2.9005 | 2.6406  |
| 8  | C | -0.1256 | -2.9945 | 1.6468  |
| 9  | C | 0.0497  | -1.9166 | 0.7579  |
| 10 | C | 1.0172  | -2.0324 | -0.2387 |
| 11 | C | 1.8345  | -3.1615 | -0.3044 |
| 12 | C | 1.7023  | -4.2147 | 0.6146  |
| 13 | C | 0.7018  | -4.1406 | 1.6072  |
| 14 | C | -4.6196 | -4.8004 | -0.3129 |
| 15 | O | -5.6385 | -2.5859 | 3.9073  |
| 16 | C | 0.5242  | -5.2364 | 2.6441  |
| 17 | C | 1.2474  | -4.9275 | 3.9289  |
| 18 | C | 2.6286  | -5.3944 | 0.4938  |
| 19 | O | 1.2717  | -1.073  | -1.181  |
| 20 | C | 0.291   | -0.0261 | -1.3297 |
| 21 | C | -0.2057 | 0.4735  | 0.0449  |
| 22 | C | -0.7908 | -0.6715 | 0.8689  |
| 23 | O | 0.862   | 1.0814  | 0.7901  |
| 24 | C | 1.0112  | 1.1088  | -2.0765 |
| 25 | C | -0.856  | -0.5354 | -2.2191 |
| 26 | C | 0.7332  | -4.8017 | 5.1689  |
| 27 | C | -0.7182 | -4.9539 | 5.5316  |
| 28 | C | 1.6273  | -4.4727 | 6.3364  |
| 29 | H | -6.1715 | -3.8118 | 1.7119  |
| 30 | H | -2.9983 | -2.2396 | 4.1455  |
| 31 | H | -2.0847 | -4.1946 | 0.4235  |
| 32 | H | 2.5924  | -3.2096 | -1.0846 |
| 33 | H | -3.9485 | -4.6006 | -1.1549 |
| 34 | H | -4.6305 | -5.8767 | -0.1157 |
| 35 | H | -5.6235 | -4.486  | -0.6168 |
| 36 | H | -5.2005 | -2.148  | 4.6558  |
| 37 | H | 0.9052  | -6.1894 | 2.2599  |
| 38 | H | -0.5426 | -5.4236 | 2.791   |
| 39 | H | 2.3219  | -4.7917 | 3.8053  |
| 40 | H | 3.4003  | -5.2242 | -0.2649 |
| 41 | H | 3.1452  | -5.5778 | 1.4409  |
| 42 | H | 2.0675  | -6.2871 | 0.2003  |
| 43 | H | -0.9663 | 1.2525  | -0.0813 |
| 44 | H | -1.8011 | -0.8991 | 0.5108  |
| 45 | H | -0.855  | -0.3642 | 1.9196  |
| 46 | H | 1.5889  | 0.4307  | 0.8208  |

|    |   |         |         |         |
|----|---|---------|---------|---------|
| 47 | H | 0.3557  | 1.9736  | -2.2226 |
| 48 | H | 1.359   | 0.7689  | -3.0592 |
| 49 | H | 1.9076  | 1.4361  | -1.5379 |
| 50 | H | -1.6048 | 0.2452  | -2.3887 |
| 51 | H | -0.4729 | -0.8644 | -3.1923 |
| 52 | H | -1.3603 | -1.4059 | -1.7875 |
| 53 | H | -1.1075 | -4.0086 | 5.9241  |
| 54 | H | -0.8327 | -5.7207 | 6.3053  |
| 55 | H | -1.3525 | -5.2479 | 4.6939  |
| 56 | H | 1.5786  | -5.2683 | 7.0871  |
| 57 | H | 2.6755  | -4.3596 | 6.04    |
| 58 | H | 1.3112  | -3.5337 | 6.8025  |

| (8R)-1,Conf. H |      | Standard Orientation<br>(Ångstroms) |         |         |
|----------------|------|-------------------------------------|---------|---------|
| No.            | Atom | X                                   | Y       | Z       |
| 1              | C    | -4.6501                             | -2.5319 | 3.4274  |
| 2              | C    | -5.1588                             | -3.2642 | 2.3495  |
| 3              | C    | -4.2929                             | -3.8128 | 1.4083  |
| 4              | C    | -2.9147                             | -3.653  | 1.5188  |
| 5              | C    | -2.3969                             | -2.926  | 2.5939  |
| 6              | C    | -3.2627                             | -2.3811 | 3.5492  |
| 7              | O    | -1.0541                             | -2.7045 | 2.8313  |
| 8              | C    | -0.1692                             | -2.9265 | 1.7962  |
| 9              | C    | 0.0057                              | -1.9306 | 0.8162  |
| 10             | C    | 0.8978                              | -2.1781 | -0.2255 |
| 11             | C    | 1.6474                              | -3.3549 | -0.2511 |
| 12             | C    | 1.5205                              | -4.3253 | 0.7558  |
| 13             | C    | 0.5924                              | -4.1178 | 1.7986  |
| 14             | C    | -5.5711                             | -1.9711 | 4.469   |
| 15             | O    | -4.8444                             | -4.5161 | 0.3769  |
| 16             | C    | 0.4276                              | -5.1174 | 2.9307  |
| 17             | C    | 1.2533                              | -4.7534 | 4.1366  |
| 18             | C    | 2.3751                              | -5.5613 | 0.6747  |
| 19             | O    | 1.1404                              | -1.3101 | -1.2552 |
| 20             | C    | 0.2137                              | -0.2176 | -1.4228 |
| 21             | C    | -0.162                              | 0.4113  | -0.063  |
| 22             | C    | -0.7553                             | -0.6321 | 0.8815  |
| 23             | O    | 0.985                               | 1.0064  | 0.5652  |
| 24             | C    | 0.9466                              | 0.8126  | -2.2979 |
| 25             | C    | -1.0168                             | -0.7189 | -2.1978 |
| 26             | C    | 0.8318                              | -4.4863 | 5.3891  |



|    |   |         |         |         |
|----|---|---------|---------|---------|
| 27 | C | -0.5994 | -4.5007 | 5.8507  |
| 28 | C | 1.821   | -4.1246 | 6.4669  |
| 29 | H | -6.2299 | -3.4141 | 2.2385  |
| 30 | H | -2.2572 | -4.0969 | 0.7802  |
| 31 | H | -2.8449 | -1.8323 | 4.3908  |
| 32 | H | 2.3497  | -3.5059 | -1.0693 |
| 33 | H | -5.7237 | -2.7039 | 5.2672  |
| 34 | H | -5.1573 | -1.0549 | 4.9034  |
| 35 | H | -6.5426 | -1.7137 | 4.0341  |
| 36 | H | -4.1294 | -4.8504 | -0.1895 |
| 37 | H | 0.729   | -6.1183 | 2.6014  |
| 38 | H | -0.6348 | -5.2297 | 3.1612  |
| 39 | H | 2.3239  | -4.706  | 3.9372  |
| 40 | H | 2.9442  | -5.6981 | 1.5994  |
| 41 | H | 1.7505  | -6.4413 | 0.4919  |
| 42 | H | 3.1015  | -5.4955 | -0.1425 |
| 43 | H | -0.8844 | 1.2238  | -0.2021 |
| 44 | H | -1.798  | -0.824  | 0.6044  |
| 45 | H | -0.7334 | -0.2449 | 1.9072  |
| 46 | H | 1.6728  | 0.3154  | 0.6083  |
| 47 | H | 0.3337  | 1.7036  | -2.4691 |
| 48 | H | 1.208   | 0.3808  | -3.2713 |
| 49 | H | 1.8943  | 1.1217  | -1.8429 |
| 50 | H | -1.7299 | 0.0918  | -2.3798 |
| 51 | H | -0.7184 | -1.1406 | -3.1648 |
| 52 | H | -1.5395 | -1.5231 | -1.6704 |
| 53 | H | -0.8974 | -3.4993 | 6.1787  |
| 54 | H | -0.7137 | -5.1878 | 6.6959  |
| 55 | H | -1.3061 | -4.8188 | 5.0826  |
| 56 | H | 1.7691  | -4.848  | 7.2872  |
| 57 | H | 2.8525  | -4.1128 | 6.0993  |
| 58 | H | 1.5995  | -3.129  | 6.8654  |

| (8R)-1, Conf. I |      | Standard Orientation<br>(Ångstroms) |         |        |
|-----------------|------|-------------------------------------|---------|--------|
| No.             | Atom | X                                   | Y       | Z      |
| 1               | C    | -4.4266                             | -3.7593 | 0.9454 |
| 2               | C    | -5.381                              | -3.1699 | 1.7825 |
| 3               | C    | -4.9761                             | -2.4207 | 2.8822 |
| 4               | C    | -3.6273                             | -2.248  | 3.1714 |
| 5               | C    | -2.6655                             | -2.8339 | 2.345  |
| 6               | C    | -3.0651                             | -3.6004 | 1.2433 |

|    |   |         |         |         |
|----|---|---------|---------|---------|
| 7  | O | -1.3554 | -2.612  | 2.7248  |
| 8  | C | -0.3638 | -2.865  | 1.7987  |
| 9  | C | -0.0822 | -1.9009 | 0.8113  |
| 10 | C | 0.9246  | -2.1754 | -0.1127 |
| 11 | C | 1.6762  | -3.3467 | -0.0137 |
| 12 | C | 1.434   | -4.2875 | 1       |
| 13 | C | 0.3947  | -4.0516 | 1.9254  |
| 14 | C | -4.8552 | -4.6033 | -0.2181 |
| 15 | O | -5.947  | -1.8666 | 3.6639  |
| 16 | C | 0.1134  | -5.019  | 3.0635  |
| 17 | C | 0.926   | -4.7058 | 4.2925  |
| 18 | C | 2.3041  | -5.5133 | 1.0665  |
| 19 | O | 1.2824  | -1.3382 | -1.1347 |
| 20 | C | 0.3748  | -0.2619 | -1.4467 |
| 21 | C | -0.1577 | 0.4089  | -0.1615 |
| 22 | C | -0.8513 | -0.6072 | 0.7434  |
| 23 | O | 0.9069  | 1.0325  | 0.5751  |
| 24 | C | 1.1976  | 0.7451  | -2.2672 |
| 25 | C | -0.7555 | -0.801  | -2.34   |
| 26 | C | 1.7476  | -5.5183 | 4.987   |
| 27 | C | 2.026   | -6.9608 | 4.6677  |
| 28 | C | 2.4809  | -5.0049 | 6.1997  |
| 29 | H | -6.4429 | -3.294  | 1.5851  |
| 30 | H | -3.3069 | -1.6652 | 4.0289  |
| 31 | H | -2.3289 | -4.0842 | 0.6068  |
| 32 | H | 2.4704  | -3.5176 | -0.7384 |
| 33 | H | -4.1277 | -4.54   | -1.0342 |
| 34 | H | -4.9499 | -5.6483 | 0.0925  |
| 35 | H | -5.8177 | -4.2634 | -0.6148 |
| 36 | H | -5.522  | -1.389  | 4.3954  |
| 37 | H | 0.2559  | -6.0432 | 2.7108  |
| 38 | H | -0.9472 | -4.9805 | 3.3377  |
| 39 | H | 0.8038  | -3.6804 | 4.6441  |
| 40 | H | 1.6994  | -6.4194 | 0.9624  |
| 41 | H | 3.0447  | -5.5249 | 0.2593  |
| 42 | H | 2.8543  | -5.5407 | 2.0112  |
| 43 | H | -0.8624 | 1.2108  | -0.4099 |
| 44 | H | -1.854  | -0.8168 | 0.3545  |
| 45 | H | -0.9498 | -0.1853 | 1.7508  |
| 46 | H | 1.5961  | 0.353   | 0.7019  |
| 47 | H | 0.6032  | 1.6236  | -2.5389 |
| 48 | H | 1.5721  | 0.283   | -3.1883 |
| 49 | H | 2.0846  | 1.079   | -1.7172 |

|    |   |         |         |         |
|----|---|---------|---------|---------|
| 50 | H | -1.4472 | -0.0037 | -2.631  |
| 51 | H | -0.3454 | -1.2528 | -3.2509 |
| 52 | H | -1.3312 | -1.5917 | -1.8484 |
| 53 | H | 1.7656  | -7.5918 | 5.5241  |
| 54 | H | 3.0906  | -7.0979 | 4.4504  |
| 55 | H | 1.4659  | -7.3356 | 3.8091  |
| 56 | H | 3.5624  | -5.0955 | 6.0544  |
| 57 | H | 2.2608  | -3.9521 | 6.4056  |
| 58 | H | 2.1986  | -5.5826 | 7.0861  |

| (8R)-1, Conf. J |      | Standard Orientation<br>(Ångstroms) |         |         |
|-----------------|------|-------------------------------------|---------|---------|
| No.             | Atom | X                                   | Y       | Z       |
| 1               | C    | -4.5648                             | -2.0458 | 3.6659  |
| 2               | C    | -4.9735                             | -3.0276 | 2.7559  |
| 3               | C    | -4.0449                             | -3.5912 | 1.8841  |
| 4               | C    | -2.7091                             | -3.2034 | 1.9044  |
| 5               | C    | -2.2881                             | -2.2343 | 2.8165  |
| 6               | C    | -3.2159                             | -1.6655 | 3.6969  |
| 7               | O    | -0.9967                             | -1.7637 | 2.9532  |
| 8               | C    | -0.0409                             | -2.214  | 2.0665  |
| 9               | C    | 0.0953                              | -1.5619 | 0.8252  |
| 10              | C    | 1.0536                              | -2.0346 | -0.0692 |
| 11              | C    | 1.8992                              | -3.0841 | 0.2901  |
| 12              | C    | 1.8094                              | -3.6975 | 1.5503  |
| 13              | C    | 0.8266                              | -3.2573 | 2.4643  |
| 14              | C    | -5.5411                             | -1.4523 | 4.6378  |
| 15              | O    | -4.4124                             | -4.5468 | 0.9816  |
| 16              | C    | 0.6951                              | -3.881  | 3.8447  |
| 17              | C    | -0.0322                             | -5.1998 | 3.8278  |
| 18              | C    | 2.756                               | -4.8241 | 1.8663  |
| 19              | O    | 1.2676                              | -1.5129 | -1.3163 |
| 20              | C    | 0.2471                              | -0.6394 | -1.8413 |
| 21              | C    | -0.2494                             | 0.348   | -0.7624 |
| 22              | C    | -0.7843                             | -0.3944 | 0.4603  |
| 23              | O    | 0.8068                              | 1.2282  | -0.3435 |
| 24              | C    | 0.9163                              | 0.1284  | -2.9934 |
| 25              | C    | -0.8916                             | -1.4909 | -2.4283 |
| 26              | C    | 0.3693                              | -6.3875 | 4.3239  |
| 27              | C    | 1.6722                              | -6.6454 | 5.0278  |
| 28              | C    | -0.5139                             | -7.6023 | 4.1987  |
| 29              | H    | -6.0125                             | -3.3436 | 2.7366  |

|    |   |         |         |         |
|----|---|---------|---------|---------|
| 30 | H | -2.0201 | -3.6749 | 1.211   |
| 31 | H | -2.8767 | -0.918  | 4.4114  |
| 32 | H | 2.643   | -3.4223 | -0.4293 |
| 33 | H | -5.5586 | -2.0434 | 5.5585  |
| 34 | H | -5.2685 | -0.4206 | 4.8838  |
| 35 | H | -6.5501 | -1.4286 | 4.213   |
| 36 | H | -5.3602 | -4.7286 | 1.0893  |
| 37 | H | 0.151   | -3.2068 | 4.5169  |
| 38 | H | 1.6911  | -3.9509 | 4.29    |
| 39 | H | -1.0128 | -5.1533 | 3.3542  |
| 40 | H | 3.2741  | -4.6453 | 2.8131  |
| 41 | H | 2.2153  | -5.7736 | 1.9114  |
| 42 | H | 3.5303  | -4.9229 | 1.0975  |
| 43 | H | -1.0377 | 0.994   | -1.1657 |
| 44 | H | -1.7917 | -0.7686 | 0.2472  |
| 45 | H | -0.8433 | 0.2992  | 1.3077  |
| 46 | H | 1.5578  | 0.6606  | -0.0854 |
| 47 | H | 0.2281  | 0.8461  | -3.4516 |
| 48 | H | 1.2638  | -0.562  | -3.7711 |
| 49 | H | 1.807   | 0.667   | -2.6509 |
| 50 | H | -1.6699 | -0.8621 | -2.8729 |
| 51 | H | -0.5088 | -2.1666 | -3.2021 |
| 52 | H | -1.3592 | -2.1339 | -1.6758 |
| 53 | H | 2.2836  | -5.7509 | 5.1595  |
| 54 | H | 2.2667  | -7.3706 | 4.4623  |
| 55 | H | 1.4848  | -7.0572 | 6.0252  |
| 56 | H | -0.767  | -7.9909 | 5.1906  |
| 57 | H | -1.4525 | -7.3842 | 3.6782  |
| 58 | H | 0.0015  | -8.3885 | 3.6374  |

| (8R)-1,Conf. K |      | Standard Orientation<br>(Ångstroms) |         |        |
|----------------|------|-------------------------------------|---------|--------|
| No.            | Atom | X                                   | Y       | Z      |
| 1              | C    | -4.9011                             | -1.9313 | 3.2866 |
| 2              | C    | -5.4092                             | -2.7357 | 2.261  |
| 3              | C    | -4.5411                             | -3.4339 | 1.4272 |
| 4              | C    | -3.1617                             | -3.354  | 1.595  |
| 5              | C    | -2.6447                             | -2.5546 | 2.6183 |
| 6              | C    | -3.5136                             | -1.8594 | 3.4673 |
| 7              | O    | -1.301                              | -2.397  | 2.9008 |
| 8              | C    | -0.3918                             | -2.7634 | 1.9293 |
| 9              | C    | -0.1187                             | -1.8733 | 0.8724 |

|    |   |         |         |         |
|----|---|---------|---------|---------|
| 10 | C | 0.7998  | -2.2638 | -0.1002 |
| 11 | C | 1.4789  | -3.4773 | 0.0144  |
| 12 | C | 1.2497  | -4.3448 | 1.0944  |
| 13 | C | 0.2963  | -3.9903 | 2.073   |
| 14 | C | -5.8282 | -1.2077 | 4.2166  |
| 15 | O | -5.0919 | -4.2023 | 0.4429  |
| 16 | C | 0.0375  | -4.8729 | 3.2831  |
| 17 | C | 0.9541  | -4.5477 | 4.4329  |
| 18 | C | 2.0443  | -5.6203 | 1.1739  |
| 19 | O | 1.138   | -1.5076 | -1.1895 |
| 20 | C | 0.288   | -0.3836 | -1.4965 |
| 21 | C | -0.1067 | 0.3851  | -0.2163 |
| 22 | C | -0.8031 | -0.5338 | 0.7853  |
| 23 | O | 1.0465  | 0.9667  | 0.4133  |
| 24 | C | 1.1198  | 0.5205  | -2.4213 |
| 25 | C | -0.9361 | -0.8813 | -2.2838 |
| 26 | C | 1.7729  | -5.3733 | 5.1153  |
| 27 | C | 1.9405  | -6.8455 | 4.8615  |
| 28 | C | 2.6202  | -4.8441 | 6.2441  |
| 29 | H | -6.4819 | -2.826  | 2.1083  |
| 30 | H | -2.5036 | -3.9136 | 0.9405  |
| 31 | H | -3.0991 | -1.255  | 4.2716  |
| 32 | H | 2.2081  | -3.7393 | -0.7506 |
| 33 | H | -6.0656 | -1.8416 | 5.0764  |
| 34 | H | -5.3733 | -0.2786 | 4.576   |
| 35 | H | -6.7596 | -0.9373 | 3.7082  |
| 36 | H | -4.3769 | -4.6407 | -0.0473 |
| 37 | H | 0.0897  | -5.9222 | 2.9832  |
| 38 | H | -0.9962 | -4.7488 | 3.6262  |
| 39 | H | 0.9191  | -3.4994 | 4.7331  |
| 40 | H | 2.7182  | -5.728  | 0.317   |
| 41 | H | 2.6626  | -5.6295 | 2.0759  |
| 42 | H | 1.3782  | -6.4885 | 1.171   |
| 43 | H | -0.7711 | 1.2221  | -0.4602 |
| 44 | H | -1.8419 | -0.6916 | 0.4748  |
| 45 | H | -0.8035 | -0.0568 | 1.7727  |
| 46 | H | 1.6928  | 0.2461  | 0.5382  |
| 47 | H | 0.5705  | 1.4259  | -2.6991 |
| 48 | H | 1.3965  | -0.0112 | -3.3395 |
| 49 | H | 2.0639  | 0.8147  | -1.9493 |
| 50 | H | -1.5896 | -0.0508 | -2.5702 |
| 51 | H | -0.6226 | -1.4048 | -3.1947 |
| 52 | H | -1.5295 | -1.6036 | -1.7142 |

|    |   |        |         |        |
|----|---|--------|---------|--------|
| 53 | H | 1.7019 | -7.412  | 5.7679 |
| 54 | H | 2.9772 | -7.0624 | 4.5831 |
| 55 | H | 1.3009 | -7.2284 | 4.0643 |
| 56 | H | 3.6813 | -5.0114 | 6.0314 |
| 57 | H | 2.4792 | -3.7699 | 6.4035 |
| 58 | H | 2.3675 | -5.3545 | 7.1792 |

| (8 <i>R</i> )-1, Conf. L |      | Standard Orientation<br>(Ångstroms) |         |         |
|--------------------------|------|-------------------------------------|---------|---------|
| No.                      | Atom | X                                   | Y       | Z       |
| 1                        | C    | -3.1589                             | -2.2634 | 3.6315  |
| 2                        | C    | -4.3733                             | -2.9391 | 3.4593  |
| 3                        | C    | -4.494                              | -3.8977 | 2.4571  |
| 4                        | C    | -3.4218                             | -4.2039 | 1.6283  |
| 5                        | C    | -2.2017                             | -3.5474 | 1.7982  |
| 6                        | C    | -2.072                              | -2.5809 | 2.802   |
| 7                        | O    | -1.2042                             | -3.9411 | 0.9278  |
| 8                        | C    | 0.0039                              | -3.2764 | 0.9698  |
| 9                        | C    | 0.1731                              | -2.1266 | 0.1728  |
| 10                       | C    | 1.4231                              | -1.5087 | 0.1606  |
| 11                       | C    | 2.4665                              | -2.0017 | 0.9443  |
| 12                       | C    | 2.3094                              | -3.1557 | 1.7279  |
| 13                       | C    | 1.066                               | -3.8264 | 1.7261  |
| 14                       | C    | -2.9959                             | -1.2576 | 4.7326  |
| 15                       | O    | -5.6634                             | -4.5717 | 2.2581  |
| 16                       | C    | 0.8569                              | -5.1063 | 2.5209  |
| 17                       | C    | 0.4235                              | -4.8485 | 3.9413  |
| 18                       | C    | 3.497                               | -3.6612 | 2.5027  |
| 19                       | O    | 1.7265                              | -0.3978 | -0.5795 |
| 20                       | C    | 0.8281                              | -0.0727 | -1.6599 |
| 21                       | C    | -0.6435                             | -0.1985 | -1.2121 |
| 22                       | C    | -0.9467                             | -1.6013 | -0.6882 |
| 23                       | O    | -0.9472                             | 0.7545  | -0.1791 |
| 24                       | C    | 1.1458                              | 1.3848  | -2.0339 |
| 25                       | C    | 1.1522                              | -0.9608 | -2.8732 |
| 26                       | C    | -0.5913                             | -5.4196 | 4.6211  |
| 27                       | C    | -1.516                              | -6.4777 | 4.0856  |
| 28                       | C    | -0.8895                             | -5.0067 | 6.0391  |
| 29                       | H    | -5.2119                             | -2.7114 | 4.1105  |
| 30                       | H    | -3.5339                             | -4.9575 | 0.8547  |
| 31                       | H    | -1.1259                             | -2.0711 | 2.9612  |
| 32                       | H    | 3.4248                              | -1.4857 | 0.9183  |

|    |   |         |         |         |
|----|---|---------|---------|---------|
| 33 | H | -2.2922 | -0.4708 | 4.4409  |
| 34 | H | -3.9494 | -0.7708 | 4.9628  |
| 35 | H | -2.6232 | -1.7501 | 5.636   |
| 36 | H | -6.3217 | -4.2423 | 2.8914  |
| 37 | H | 1.7921  | -5.6782 | 2.5446  |
| 38 | H | 0.1605  | -5.7522 | 1.979   |
| 39 | H | 1.0179  | -4.0968 | 4.4595  |
| 40 | H | 3.2403  | -3.8165 | 3.5543  |
| 41 | H | 3.8589  | -4.599  | 2.0697  |
| 42 | H | 4.325   | -2.9442 | 2.4805  |
| 43 | H | -1.3204 | 0.031   | -2.043  |
| 44 | H | -1.0842 | -2.2918 | -1.5286 |
| 45 | H | -1.8796 | -1.566  | -0.1166 |
| 46 | H | -0.2774 | 0.6311  | 0.5196  |
| 47 | H | 0.4935  | 1.7456  | -2.8359 |
| 48 | H | 2.1866  | 1.4836  | -2.3645 |
| 49 | H | 1.0411  | 2.0516  | -1.1708 |
| 50 | H | 0.5169  | -0.7116 | -3.7295 |
| 51 | H | 2.1998  | -0.8383 | -3.1724 |
| 52 | H | 1.0271  | -2.0257 | -2.6532 |
| 53 | H | -2.5516 | -6.1238 | 4.1165  |
| 54 | H | -1.4453 | -7.381  | 4.701   |
| 55 | H | -1.2997 | -6.7704 | 3.0567  |
| 56 | H | -0.8012 | -5.8667 | 6.7109  |
| 57 | H | -0.206  | -4.231  | 6.4001  |
| 58 | H | -1.9078 | -4.6105 | 6.1117  |

| (8R)-1,Conf. M |      | Standard Orientation<br>(Ångstroms) |         |        |
|----------------|------|-------------------------------------|---------|--------|
| No.            | Atom | X                                   | Y       | Z      |
| 1              | C    | -3.1185                             | -2.178  | 3.7306 |
| 2              | C    | -4.338                              | -2.8538 | 3.6131 |
| 3              | C    | -4.5077                             | -3.8158 | 2.6238 |
| 4              | C    | -3.4742                             | -4.1297 | 1.748  |
| 5              | C    | -2.2455                             | -3.4743 | 1.8655 |
| 6              | C    | -2.0698                             | -2.5014 | 2.8564 |
| 7              | O    | -1.2872                             | -3.8766 | 0.9549 |
| 8              | C    | -0.057                              | -3.2525 | 0.9769 |
| 9              | C    | 0.1341                              | -2.1089 | 0.176  |
| 10             | C    | 1.4023                              | -1.5305 | 0.1405 |
| 11             | C    | 2.4436                              | -2.056  | 0.9055 |
| 12             | C    | 2.2641                              | -3.2035 | 1.6937 |

|    |   |         |         |         |
|----|---|---------|---------|---------|
| 13 | C | 1.0005  | -3.8351 | 1.7149  |
| 14 | C | -2.9108 | -1.1678 | 4.8193  |
| 15 | O | -5.7176 | -4.4417 | 2.5482  |
| 16 | C | 0.7668  | -5.1062 | 2.5172  |
| 17 | C | 0.3658  | -4.8308 | 3.9437  |
| 18 | C | 3.4486  | -3.7443 | 2.4494  |
| 19 | O | 1.7268  | -0.4294 | -0.605  |
| 20 | C | 0.8179  | -0.0723 | -1.6662 |
| 21 | C | -0.648  | -0.1535 | -1.1902 |
| 22 | C | -0.9849 | -1.5472 | -0.6626 |
| 23 | O | -0.9031 | 0.806   | -0.1507 |
| 24 | C | 1.174   | 1.3757  | -2.0424 |
| 25 | C | 1.0899  | -0.9663 | -2.8879 |
| 26 | C | -0.6327 | -5.3949 | 4.6527  |
| 27 | C | -1.5611 | -6.4671 | 4.1542  |
| 28 | C | -0.9064 | -4.9578 | 6.0687  |
| 29 | H | -5.1598 | -2.6348 | 4.2901  |
| 30 | H | -3.6015 | -4.8833 | 0.978   |
| 31 | H | -1.1177 | -1.991  | 2.9718  |
| 32 | H | 3.417   | -1.5701 | 0.8622  |
| 33 | H | -2.4892 | -1.6541 | 5.7045  |
| 34 | H | -2.2296 | -0.3758 | 4.4907  |
| 35 | H | -3.856  | -0.6889 | 5.0956  |
| 36 | H | -5.6946 | -5.0708 | 1.8086  |
| 37 | H | 1.6841  | -5.7066 | 2.5257  |
| 38 | H | 0.0392  | -5.7297 | 1.9901  |
| 39 | H | 0.9666  | -4.068  | 4.438   |
| 40 | H | 3.2035  | -3.8954 | 3.5044  |
| 41 | H | 3.7772  | -4.6907 | 2.0087  |
| 42 | H | 4.2959  | -3.0506 | 2.4166  |
| 43 | H | -1.3331 | 0.0983  | -2.0078 |
| 44 | H | -1.1597 | -2.2314 | -1.5013 |
| 45 | H | -1.9051 | -1.4851 | -0.0726 |
| 46 | H | -0.2237 | 0.6634  | 0.535   |
| 47 | H | 0.5176  | 1.7596  | -2.8302 |
| 48 | H | 2.2106  | 1.4428  | -2.3933 |
| 49 | H | 1.1075  | 2.0424  | -1.1754 |
| 50 | H | 0.446   | -0.6945 | -3.7309 |
| 51 | H | 2.1348  | -0.876  | -3.2074 |
| 52 | H | 0.9355  | -2.0274 | -2.6681 |
| 53 | H | -1.3515 | -6.7881 | 3.1323  |
| 54 | H | -2.5966 | -6.113  | 4.1837  |
| 55 | H | -1.4848 | -7.3535 | 4.7931  |



|    |   |         |         |        |
|----|---|---------|---------|--------|
| 56 | H | -0.7978 | -5.8043 | 6.7546 |
| 57 | H | -0.2224 | -4.1701 | 6.4015 |
| 58 | H | -1.9262 | -4.5682 | 6.154  |

| (8R)-1, Conf. N |      | Standard Orientation<br>(Ångstroms) |         |         |
|-----------------|------|-------------------------------------|---------|---------|
| No.             | Atom | X                                   | Y       | Z       |
| 1               | C    | -4.6248                             | -2.6794 | 3.3943  |
| 2               | C    | -5.1081                             | -3.3993 | 2.2953  |
| 3               | C    | -4.2175                             | -3.8821 | 1.3387  |
| 4               | C    | -2.8479                             | -3.6696 | 1.4567  |
| 5               | C    | -2.356                              | -2.9584 | 2.5519  |
| 6               | C    | -3.2437                             | -2.4766 | 3.5208  |
| 7               | O    | -1.0241                             | -2.6908 | 2.7996  |
| 8               | C    | -0.1184                             | -2.9048 | 1.7811  |
| 9               | C    | 0.0589                              | -1.9093 | 0.8013  |
| 10              | C    | 0.9798                              | -2.1421 | -0.2187 |
| 11              | C    | 1.7528                              | -3.3038 | -0.2235 |
| 12              | C    | 1.62                                | -4.2746 | 0.7821  |
| 13              | C    | 0.6644                              | -4.0821 | 1.8031  |
| 14              | C    | -5.5627                             | -2.1847 | 4.4551  |
| 15              | O    | -4.6578                             | -4.5844 | 0.2545  |
| 16              | C    | 0.4911                              | -5.0838 | 2.9318  |
| 17              | C    | 1.2896                              | -4.709  | 4.1533  |
| 18              | C    | 2.4952                              | -5.497  | 0.7209  |
| 19              | O    | 1.2285                              | -1.2719 | -1.2455 |
| 20              | C    | 0.2739                              | -0.2095 | -1.4455 |
| 21              | C    | -0.149                              | 0.4209  | -0.1004 |
| 22              | C    | -0.734                              | -0.6293 | 0.8415  |
| 23              | O    | 0.9679                              | 1.0528  | 0.5467  |
| 24              | C    | 0.996                               | 0.8333  | -2.3147 |
| 25              | C    | -0.9243                             | -0.753  | -2.2424 |
| 26              | C    | 0.8432                              | -4.4579 | 5.4004  |
| 27              | C    | -0.5942                             | -4.5073 | 5.8391  |
| 28              | C    | 1.8073                              | -4.0792 | 6.4948  |
| 29              | H    | -6.1749                             | -3.5782 | 2.1971  |
| 30              | H    | -2.1896                             | -4.0715 | 0.6935  |
| 31              | H    | -2.8468                             | -1.9371 | 4.3784  |
| 32              | H    | 2.4747                              | -3.4444 | -1.0261 |
| 33              | H    | -5.6817                             | -2.9449 | 5.2332  |
| 34              | H    | -5.1838                             | -1.2649 | 4.9131  |
| 35              | H    | -6.5459                             | -1.9548 | 4.0314  |

|    |   |         |         |         |
|----|---|---------|---------|---------|
| 36 | H | -5.6239 | -4.6674 | 0.3087  |
| 37 | H | 0.812   | -6.0804 | 2.608   |
| 38 | H | -0.5737 | -5.2102 | 3.1426  |
| 39 | H | 2.3618  | -4.6367 | 3.9704  |
| 40 | H | 3.0438  | -5.6264 | 1.6589  |
| 41 | H | 1.889   | -6.3864 | 0.522   |
| 42 | H | 3.2403  | -5.4189 | -0.0782 |
| 43 | H | -0.8897 | 1.2123  | -0.263  |
| 44 | H | -1.7662 | -0.8488 | 0.5463  |
| 45 | H | -0.7413 | -0.2337 | 1.8642  |
| 46 | H | 1.6714  | 0.3791  | 0.6112  |
| 47 | H | 0.3616  | 1.7045  | -2.5082 |
| 48 | H | 1.2912  | 0.4002  | -3.2778 |
| 49 | H | 1.924   | 1.1742  | -1.8422 |
| 50 | H | -1.6549 | 0.0357  | -2.4497 |
| 51 | H | -0.5924 | -1.1768 | -3.1976 |
| 52 | H | -1.4372 | -1.5655 | -1.7179 |
| 53 | H | -0.7051 | -5.197  | 6.6828  |
| 54 | H | -1.2805 | -4.8433 | 5.0602  |
| 55 | H | -0.922  | -3.5136 | 6.162   |
| 56 | H | 1.7598  | -4.808  | 7.3106  |
| 57 | H | 2.8437  | -4.0417 | 6.143   |
| 58 | H | 1.5569  | -3.0912 | 6.8948  |

| (8R)-1,Conf. O |      | Standard Orientation<br>(Ångstroms) |         |         |
|----------------|------|-------------------------------------|---------|---------|
| No.            | Atom | X                                   | Y       | Z       |
| 1              | C    | -3.9484                             | -3.9039 | 1.5506  |
| 2              | C    | -4.9598                             | -3.3798 | 2.3652  |
| 3              | C    | -4.6537                             | -2.3915 | 3.2969  |
| 4              | C    | -3.3541                             | -1.9207 | 3.4388  |
| 5              | C    | -2.3349                             | -2.4418 | 2.6409  |
| 6              | C    | -2.6332                             | -3.4383 | 1.7034  |
| 7              | O    | -1.0816                             | -1.9099 | 2.8753  |
| 8              | C    | -0.0524                             | -2.2727 | 2.0316  |
| 9              | C    | 0.1018                              | -1.5868 | 0.8107  |
| 10             | C    | 1.1279                              | -1.9817 | -0.0451 |
| 11             | C    | 2.0185                              | -2.9855 | 0.3357  |
| 12             | C    | 1.9094                              | -3.6278 | 1.5799  |
| 13             | C    | 0.8607                              | -3.2663 | 2.4541  |
| 14             | C    | -4.2509                             | -4.9974 | 0.5685  |
| 15             | O    | -5.6147                             | -1.855  | 4.1026  |

|    |   |         |         |         |
|----|---|---------|---------|---------|
| 16 | C | 0.7075  | -3.9186 | 3.8192  |
| 17 | C | 0.0454  | -5.2701 | 3.7565  |
| 18 | C | 2.9111  | -4.6972 | 1.9231  |
| 19 | O | 1.3677  | -1.4226 | -1.2708 |
| 20 | C | 0.3282  | -0.5901 | -1.8243 |
| 21 | C | -0.275  | 0.3399  | -0.7487 |
| 22 | C | -0.8263 | -0.4633 | 0.4277  |
| 23 | O | 0.7078  | 1.2663  | -0.2582 |
| 24 | C | 1.0096  | 0.243   | -2.9225 |
| 25 | C | -0.7319 | -1.4858 | -2.4879 |
| 26 | C | 0.4954  | -6.4505 | 4.2276  |
| 27 | C | 1.8008  | -6.6669 | 4.9411  |
| 28 | C | -0.3304 | -7.7007 | 4.064   |
| 29 | H | -5.9763 | -3.7491 | 2.2658  |
| 30 | H | -3.1347 | -1.1508 | 4.173   |
| 31 | H | -1.8505 | -3.8704 | 1.0848  |
| 32 | H | 2.8155  | -3.2619 | -0.3526 |
| 33 | H | -3.6053 | -4.9187 | -0.3125 |
| 34 | H | -4.0952 | -5.974  | 1.0371  |
| 35 | H | -5.2865 | -4.9343 | 0.2184  |
| 36 | H | -6.4638 | -2.2813 | 3.9018  |
| 37 | H | 0.1066  | -3.281  | 4.4788  |
| 38 | H | 1.6871  | -3.948  | 4.3036  |
| 39 | H | -0.9327 | -5.2555 | 3.2769  |
| 40 | H | 2.428   | -5.6781 | 1.9433  |
| 41 | H | 3.7165  | -4.7434 | 1.1818  |
| 42 | H | 3.3831  | -4.4942 | 2.8888  |
| 43 | H | -1.0782 | 0.9512  | -1.176  |
| 44 | H | -1.798  | -0.8894 | 0.1544  |
| 45 | H | -0.9682 | 0.2039  | 1.2863  |
| 46 | H | 1.4729  | 0.7358  | 0.0344  |
| 47 | H | 0.3063  | 0.9349  | -3.3973 |
| 48 | H | 1.432   | -0.4067 | -3.6983 |
| 49 | H | 1.8517  | 0.819   | -2.5229 |
| 50 | H | -1.5215 | -0.8884 | -2.9553 |
| 51 | H | -0.2752 | -2.1186 | -3.258  |
| 52 | H | -1.1987 | -2.1734 | -1.7755 |
| 53 | H | 1.6205  | -7.1039 | 5.9291  |
| 54 | H | 2.3735  | -5.7506 | 5.0945  |
| 55 | H | 2.4306  | -7.3566 | 4.3695  |
| 56 | H | -0.5758 | -8.1239 | 5.0436  |
| 57 | H | -1.2724 | -7.5126 | 3.538   |
| 58 | H | 0.2259  | -8.4491 | 3.4903  |

| (8R)-1, Conf. P |      | Standard Orientation<br>(Ångstroms) |         |         |
|-----------------|------|-------------------------------------|---------|---------|
| No.             | Atom | X                                   | Y       | Z       |
| 1               | C    | -4.8878                             | -2.0885 | 3.2596  |
| 2               | C    | -5.3678                             | -2.8833 | 2.212   |
| 3               | C    | -4.469                              | -3.5201 | 1.359   |
| 4               | C    | -3.095                              | -3.3882 | 1.5311  |
| 5               | C    | -2.6067                             | -2.6021 | 2.576   |
| 6               | C    | -3.5033                             | -1.9665 | 3.4425  |
| 7               | O    | -1.2715                             | -2.3992 | 2.8666  |
| 8               | C    | -0.3409                             | -2.7539 | 1.9113  |
| 9               | C    | -0.0649                             | -1.8606 | 0.8581  |
| 10              | C    | 0.883                               | -2.2328 | -0.0936 |
| 11              | C    | 1.5861                              | -3.4306 | 0.0385  |
| 12              | C    | 1.3509                              | -4.3017 | 1.1142  |
| 13              | C    | 0.3686                              | -3.9665 | 2.0709  |
| 14              | C    | -5.8385                             | -1.4265 | 4.2124  |
| 15              | O    | -4.9055                             | -4.2992 | 0.3269  |
| 16              | C    | 0.0986                              | -4.856  | 3.2733  |
| 17              | C    | 0.98                                | -4.5133 | 4.446   |
| 18              | C    | 2.166                               | -5.5628 | 1.2101  |
| 19              | O    | 1.2268                              | -1.4712 | -1.1777 |
| 20              | C    | 0.3467                              | -0.3792 | -1.5132 |
| 21              | C    | -0.0942                             | 0.3894  | -0.2483 |
| 22              | C    | -0.7811                             | -0.5398 | 0.7502  |
| 23              | O    | 1.0303                              | 1.0107  | 0.3962  |
| 24              | C    | 1.1661                              | 0.5413  | -2.4328 |
| 25              | C    | -0.8468                             | -0.923  | -2.3169 |
| 26              | C    | 1.7981                              | -5.3228 | 5.1481  |
| 27              | C    | 2.0009                              | -6.7912 | 4.8976  |
| 28              | C    | 2.6075                              | -4.7777 | 6.2967  |
| 29              | H    | -6.4387                             | -2.9998 | 2.073   |
| 30              | H    | -2.4313                             | -3.9093 | 0.849   |
| 31              | H    | -3.1118                             | -1.3695 | 4.2637  |
| 32              | H    | 2.3353                              | -3.6792 | -0.7112 |
| 33              | H    | -6.0546                             | -2.0959 | 5.0507  |
| 34              | H    | -5.4151                             | -0.495  | 4.6025  |
| 35              | H    | -6.7784                             | -1.1708 | 3.7119  |
| 36              | H    | -5.8764                             | -4.3147 | 0.3375  |
| 37              | H    | 0.1802                              | -5.9035 | 2.9737  |
| 38              | H    | -0.9455                             | -4.7542 | 3.5911  |

---

|    |   |         |         |         |
|----|---|---------|---------|---------|
| 39 | H | 0.9168  | -3.466  | 4.7444  |
| 40 | H | 2.7582  | -5.5662 | 2.1295  |
| 41 | H | 1.5162  | -6.4429 | 1.1835  |
| 42 | H | 2.8666  | -5.6533 | 0.3728  |
| 43 | H | -0.7781 | 1.2043  | -0.5123 |
| 44 | H | -1.8107 | -0.7265 | 0.4252  |
| 45 | H | -0.8092 | -0.0558 | 1.7339  |
| 46 | H | 1.6933  | 0.3088  | 0.5395  |
| 47 | H | 0.5936  | 1.4262  | -2.7298 |
| 48 | H | 1.4755  | 0.0095  | -3.3404 |
| 49 | H | 2.092   | 0.87    | -1.9477 |
| 50 | H | -1.52   | -0.116  | -2.6244 |
| 51 | H | -0.5005 | -1.4461 | -3.216  |
| 52 | H | -1.4286 | -1.6569 | -1.7503 |
| 53 | H | 1.3868  | -7.1864 | 4.0866  |
| 54 | H | 1.7539  | -7.3631 | 5.7984  |
| 55 | H | 3.0476  | -6.9869 | 4.6422  |
| 56 | H | 3.6764  | -4.9236 | 6.1094  |
| 57 | H | 2.4414  | -3.7065 | 6.4529  |
| 58 | H | 2.3428  | -5.2935 | 7.2256  |
